# Supplementary material
Source: ML conference proceedings conference paper supplement (https://openreview.net/forum?id=jE5ZbtMtcU)
Supplement: supplementary_material [file attachment]

# BLEND: BEHAVIOR-GUIDED NEURAL POPULATION DYNAMICS MODELING VIA PRIVILEGED KNOWLEDGE DISTILLATION

**Anonymous authors**

Paper under double-blind review

## ABSTRACT

Modeling the nonlinear dynamics of neuronal populations represents a key pursuit in computational neuroscience. Recent research has increasingly focused on jointly modeling neural activity and behavior to unravel their interconnections. Despite significant efforts, these approaches often necessitate either intricate model designs or oversimplified assumptions. Given the frequent absence of perfectly paired neural-behavioral datasets in real-world scenarios when deploying these models, a critical yet understudied research question emerges: how to develop a model that performs well using only neural activity as input at inference, while benefiting from the insights gained from behavioral signals during training? To this end, we propose **BLEND**, the **B**ehavior-guided **neuraL** population dynamics **modE**lling framework via privileged **k**nowledge **D**istillation. By considering behavior as privileged information, we train a teacher model that takes both behavior observations (privileged features) and neural activities (regular features) as inputs. A student model is then distilled using only neural activity. Unlike existing methods, our framework is model-agnostic and avoids making strong assumptions about the relationship between behavior and neural activity. This allows BLEND to enhance existing neural dynamics modeling architectures without developing specialized models from scratch. Extensive experiments across neural population activity modeling and transcriptomic neuron identity prediction tasks demonstrate strong capabilities of BLEND, reporting over 50% improvement in behavioral decoding and over 15% improvement in transcriptomic neuron identity prediction after behavior-guided distillation. Furthermore, we empirically explore various behavior-guided distillation strategies within the BLEND framework and present a comprehensive analysis of effectiveness and implications for model performance.

## 1 INTRODUCTION

Large-scale population-level recordings of neural activity enable the understanding of how complex abilities of the brain in sensing, movement, and cognition emerge from the collective activity of grouped neurons (Stevenson & Kording, 2011; Jun et al., 2017; Pei et al., 2021). This insight has led to the development of various neural dynamics modeling methods to disentangle and interpret the hidden structure of neural population activity with large-volume neural recordings as inputs (Pandarinath et al., 2018; Ye & Pandarinath, 2021; Le & Shlizerman, 2022).

Alongside the recorded neural population activity, the observed behavior signals provide crucial context and complementary information during neural dynamics modeling (Sani et al., 2021). For example, behavior allows for the integration of neural data with other physiological measures (*e.g.*, muscle activity, eye movements). By incorporating behavioral information, more comprehensive and functionally relevant models of neural dynamics have been proposed (Zhou & Wei, 2020; Hurwitz et al., 2021; Schneider et al., 2023b), bridging the gap between neural activity and its real-world manifestations.

However, neural activity recordings with paired behavior signals are not always available in real-world settings, *i.e.*, behavioral data might be partial, limited, or not available for all periods of neural recording. For instance, some studies focus on resting-state neural activity, where a subject is not engaged in any specific task or receiving external stimuli. The absence of structured tasks

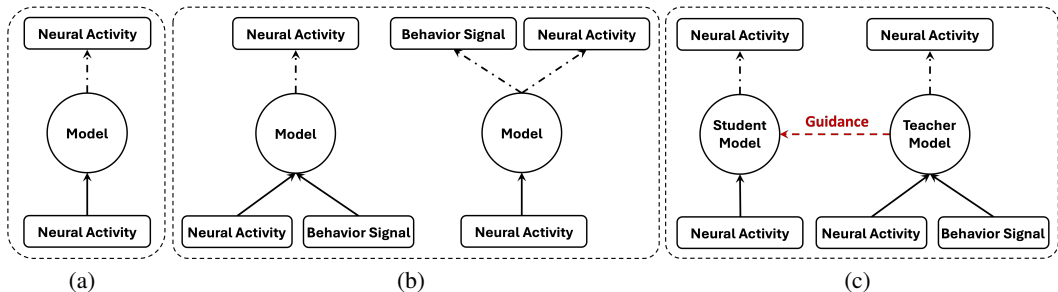

Figure 1: Schematic illustration of neural population dynamics modeling mechanisms. In this paper, we benchmark all the methods under the framework of masked neural activity reconstruction, in which the model is firstly trained in an unsupervised manner to reconstruct the randomly masked neural activity and then applied to downstream tasks such as neural activity prediction and behavior decoding. (a) Neural dynamics modeling methods that only use neural population activity as input. (b) Neural dynamics modeling methods that take behavior information as a prior. (c) Our BLEND framework, which considers behavior information as privileged knowledge for distillation.

means there’s no clear temporal alignment between neural events and behavioral events (Drew et al., 2020; Nozari et al., 2024). This discrepancy between the availability of behavioral and neural data leads to a critical distinction in the types of information accessible for model development. These features that only exist during the training stage are called *privileged features*, and those that exist throughout training and inference stages are termed *regular features* (Vapnik & Vashist, 2009). Thus, creating a model that can perform well using only regular features (neural activity) at inference time, while still benefiting from the insights gained from privileged features (behavior), represents a critical research question in neural dynamics modeling, especially in bridging the gap between controlled experimental settings and real-world applications where privileged knowledge is limited or unavailable. Maximizing the utility of existing privileged-regular feature pairs to enhance the regular-feature-based network performance is a promising strategy to answer this question. Yet in the field of computational neuroscience, these efforts remain underexplored.

To this end, in this paper, we propose **BLEND**, the **B**ehavior-guided **neuraL** population dynamics **modELLing** framework via privileged **k**nowledge **D**istillation. As shown in Fig. 1(c), BLEND constitutes a student and a teacher model, in which the teacher trains on both behavior observations and neural activity recordings, then distills knowledge to guide the student which takes only neural activity as input. This ensures the student model can make predictions using only recorded neural activity during the deployment/inference stage, but also benefits from the guidance from behavior information during the training stage, making it more versatile for settings lacking behavioral data. Our main contributions are summarized as follows:

- Built upon the privileged knowledge distillation framework, we introduce a simple yet effective neural dynamics modeling paradigm, BLEND, relying on a fundamental assumption that behavior can serve as explicit guidance for neural representation learning. Notably, our approach is model-agnostic, allowing for its seamless integration with diverse existing neural dynamics modeling architectures, thus avoiding the need for developing specialized models from scratch.
- To evaluate our framework, we conduct extensive experiments on two benchmarks, *i.e.*, Neural Latents Benchmark’21 for neural activity prediction, behavior decoding, and matching to peristimulus time histograms (PSTHs), as well as a multi-modal calcium imaging dataset for transcriptomic identity prediction. Results show that our framework elevates the performance of baseline methods by a large margin (>50% improvement in behavioral decoding and >15% improvement in neuronal identity prediction) and significantly outperforms the state-of-the-art (SOTA) models.
- We present a comprehensive analysis of our framework across base models and privileged knowledge distillation strategies, revealing key insights into the interaction between neural activity and behavior. Our results demonstrate that behavior-guided distillation not only improves model performance but fundamentally enhances the quality of learned neural representations. This leads to more accurate and nuanced modeling of neural dynamics, offering new perspectives on how behavioral information can be leveraged to better understand complex neural patterns.

108  
109  
110  
111  
112  
113  
114  
115  
116  
117  
118  
119  
120  
121  
122  
123  
124  
125  
126  
127  
128  
129  
130  
131  
132  
133  
134  
135  
136  
137  
138  
139  
140  
141  
142  
143  
144  
145  
146  
147  
148  
149  
150  
151  
152  
153  
154  
155  
156  
157  
158  
159  
160  
161

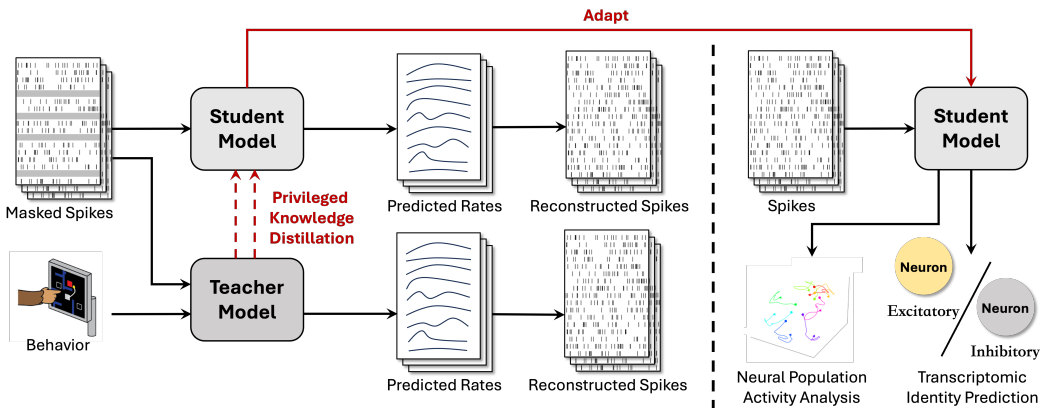

Figure 2: Illustration of the proposed **BLEND** framework, exemplified using neural spiking activity data. **Left:** Behavior-guided neural representation learning via privileged knowledge distillation. The teacher model is trained on a composite of neural activity and behavioral signals, subsequently distilling its knowledge to a student model that utilizes solely neural activity as input. **Right:** During the inference phase, the distilled student model is employed for neural population activity analysis and transcriptomic identity prediction tasks.

## 2 RELATED WORK

**Neural dynamics modeling (NDM).** NDM refers to a category of methods that aim to capture the dynamics of neural activity by using the activity recordings as inputs. A common and effective choice is the latent variable model (LVM), which leverages low-dimensional latent factors to interpret these dynamics. Various LVMs are developed, ranging from simple non-temporal models such as principal components analysis (PCA) (Cunningham & Yu, 2014) and its variants (Kobak et al., 2016), to linear dynamical systems (Macke et al., 2011; Gao et al., 2016), and to complex state space models like LFADS (Pandarinath et al., 2018). Since the advent of Transformer, its ability to capture temporal dependencies and long-range interactions makes it appropriate for neural data, with representative works such as NeuralDataTransformer (NDT) (Ye & Pandarinath, 2021), STNDT (Le & Shlizerman, 2022), and EIT (Liu et al., 2022). As shown in Fig. 1(a), methods in this category purely depend on neural activity recordings for neural population dynamics modeling yet ignore using the paired behavior information as guidance.

**Neural dynamics modeling with behavior as a prior.** In recent years, an emerging research direction has focused on jointly modeling neural population dynamics and behavioral signals. As illustrated in Fig. 1(b), these methods can be categorized into two types. The first inputs both behavior and neural activity and utilizes behavior signals to guide the learning of neural dynamics: pi-VAE (Zhou & Wei, 2020) considers the behavior variables as constraints for the construction of latent space of LVMs; CEBRA (Schneider et al., 2023b) utilizes behavior signals to construct contrastive learning samples for label-informed neural activity analysis. However, these approaches normally need to develop delicately designed modules or complex training strategies to achieve their goal. The second line of work aims to decompose neural activity into behavior-relevant and behavior-irrelevant dynamics and reconstruct both behavior signals and neural activity signals. To that end, a linear state-space model, PSID (Sani et al., 2021), is developed to decode population dynamics from motor brain regions. Nonlinear state-space models such as TNDM (Hurwitz et al., 2021) and SABLE (Jude et al., 2022) are proposed to further capture the nonlinear dynamics of neural activity and behavior observation. Nonetheless, these models assume a clear distinction between behaviorally relevant and irrelevant dynamics in input neural activity, which might not always be practical, potentially leading to oversimplification.

In contrast, our approach offers a model-agnostic learning paradigm that can be directly applied to existing LVM models without relying on strong assumptions, thereby circumventing the issues present in current LVM models that integrate behavior information as a prior.

**Learning under privileged information (LUPI).** Firstly proposed in Vapnik & Vashist (2009), LUPI refers to the setting where, alongside the primary data modality, the model has access to an

162 additional source of information. This extra source of input, termed privileged, is exclusively avail-  
 163 able during the training phase. The main objective of LUPI is to leverage this privileged information  
 164 to learn a better model in the primary data modality than one would learn without the privileged  
 165 information. This learning paradigm has been applied to different machine learning problems such  
 166 as recommendation system (Yang et al., 2022), medical image analysis (Chen et al., 2021), emotion  
 167 recognition (Aslam et al., 2023), and semantic segmentation (Liu et al., 2024).

168 In computational neuroscience, considering behavior information as privileged information to guide  
 169 neural dynamics modeling remains understudied. This work develops a novel learning paradigm that  
 170 represents an inaugural step toward addressing this underexplored research question and advancing  
 171 the field.

### 173 3 METHODS

174 This section introduces the details of our proposed **BLEND** framework, *i.e.*, the behavior-guided  
 175 neural population dynamics modeling via privileged knowledge distillation. We start with problem  
 176 formulation of behavior-guided neural dynamics modeling in Section 3.1, followed by an exposition  
 177 of the BLEND algorithm in Section 3.2. Detailed exploration of the effectiveness of the BLEND  
 178 framework can be found in Appendix A.8 and A.9, including empirical studies of implications of  
 179 behavior guidance and how to choose distillation strategies for different models and data.

#### 181 3.1 PROBLEM FORMULATION

182 We concretize the learning problem in this study with neural spiking data. For each trial of the  
 183 input neural activity, let  $\mathbf{x} \in \mathcal{X} = \mathbb{N}^{N \times T}$  represent the input spike counts, where  $\mathbf{x}_i^t$  denotes the  
 184 spike count for neuron  $i$  at time  $t$ . Let  $\mathbf{b} \in \mathcal{B} = \mathbb{R}^{B \times T}$  be the corresponding behavior signal, with  
 185  $\mathbf{b}_i^t$  denoting the behavioral signal at time  $t$ . Without loss of generality, we assume that behavioral  
 186 signals are temporally continuous and have the same number of time steps as the neural activity.<sup>1</sup>  
 187 As illustrated in Fig. 1, the model  $f_\theta$  aims to reconstruct the randomly masked neural activity  
 188 solely based on the unmasked portions of  $\mathbf{x}$  or together with the auxiliary behavior signal  $\mathbf{b}$ . The  
 189 optimization objective for masked time-series modeling (MTM) can be formulated as follows:

$$191 \theta^* = \arg \min_{\theta} \mathbb{E}_{\mathbf{x} \sim p(\mathbf{x}), \mathbf{b} \sim p(\mathbf{b}), \mathbf{m} \sim p(\mathbf{m})} \left[ \frac{1}{|\mathbf{m}|} \sum_{i,t} \mathbf{m}_i^t \cdot \mathcal{L}_{\text{rec}} \left( f_\theta (\mathbf{x}_{\bar{m}}, \mathbf{b})_i^t, \mathbf{x}_i^t \right) \right] \triangleq \mathcal{L}_{\text{MTM}} \quad (1)$$

192 where  $\mathbf{m} \in \{0, 1\}^{N \times T}$  is a binary mask with 1 indicating masked elements,  $\mathbf{x}_{\bar{m}} \in \mathcal{X}_{\bar{m}}$  represents  
 193 the unmasked portions of  $\mathbf{x}$ ,  $|\mathbf{m}|$  is the number of masked elements, and  $\mathcal{L}_{\text{rec}}$  is either Poisson or  
 194 Cross-Entropy loss as specified in the model configuration.

#### 197 3.2 BLEND

198 The goal of this work is to create a model that can make predictions using only neural activity data  
 199 during deployment/inference, but also benefits from behavior data during training. This subsection  
 200 details the algorithm of BLEND, including the formulation of privileged knowledge distillation under  
 201 the context of neural dynamics modeling, teacher-student architecture, and distillation strategies.

202 We first conceptualize the behavior-guided neural population dynamics modeling problem under the  
 203 framework of LUPI:

204 **Definition 1** (Privileged Knowledge (Yang et al., 2022)). *Consider a general learning problem with*  
 205 *input  $\mathbf{x} \in \mathcal{X}$  and label  $\mathbf{y} \in \mathcal{Y}$ . If there is an additional source of information  $\mathbf{b} \in \mathcal{B}$  that exists*  
 206 *during training but not inference, we say  $\mathbf{b}$  is the **privileged knowledge** if and only if  $I(\mathbf{y}; \mathbf{b} | \mathbf{x}) :=$*   
 207  *$H(\mathbf{y} | \mathbf{x}) - H(\mathbf{y} | \mathbf{x}, \mathbf{b}) > 0$ .*

208 In Definition 1,  $I(\cdot | \cdot)$  and  $H(\cdot | \cdot)$  represent conditional mutual information and conditional entropy,  
 209 respectively. According to Definition 1, the behavior information  $\mathbf{b}$  serves as the privileged knowl-  
 210 edge and offers additional predictive capabilities of label  $\mathbf{y}$ , which is the unmasked neural activity  
 211  $\mathbf{x}$  in our scenario. Next, we introduce the proposed privileged knowledge distillation framework,  
 212 which is designed to incorporate behavioral guidance and facilitate neural dynamics modeling.

213 <sup>1</sup>BLEND can be readily extended to accommodate scenarios wherein behavioral information is discrete or  
 214 non-temporal in nature, see preliminary explorations in Appendix A.10.

### 3.2.1 PRIVILEGED KNOWLEDGE DISTILLATION WITH BEHAVIOR AS GUIDANCE

As is illustrated in Fig. 2, BLEND employs a teacher-student architecture to realize our goal: by leveraging the privileged information  $\mathbf{b}$  at the training phase, to learn an LVM model for inference phase that outperforms those built on the regular feature  $\mathbf{x}$  alone. This procedure is divided into two sequential stages:

**Stage 1: Train a teacher model with regular information and privileged information.** The teacher model  $f_{\theta_T} \in \{f|f : \mathcal{X}_{\bar{m}} \times \mathcal{B} \mapsto \mathcal{X}\}$  takes both masked neural activity recordings  $\mathbf{x}$  and the corresponding behavior signals  $\mathbf{b}$  as inputs. The model parameter  $\theta_T$  is optimized by minimizing the MTM loss  $\mathcal{L}_{\text{MTM}}$  formulated in Eq. (1).

**Stage 2: Train a student model with regular information by distillation.** By exploiting all available sources of information, the teacher model acquires a rich understanding of the neural population dynamics. We then aim to distill the learned knowledge to the student model  $f_{\theta_S} \in \{f|f : \mathcal{X}_{\bar{m}} \mapsto \mathcal{X}\}$ , which takes the neural activity as input. The parameter of student model  $\theta_S$  is updated by minimizing the following objective:

$$\mathbb{E}_{\mathbf{x}, \mathbf{b}, \mathbf{m}} \left[ \underbrace{\alpha \cdot \frac{1}{|\mathbf{m}|} \sum_{i,t} \mathbf{m}_i^t \cdot \mathcal{L}_{\text{rec}} \left( f_{\theta_S}(\mathbf{x}_{\bar{m}})_i^t, \mathbf{x}_i^t \right)}_{\text{MTM Loss}} + \underbrace{(1 - \alpha) \cdot \sum_{i,t} \mathcal{L}_{\text{distill}} \left( f_{\theta_S}(\mathbf{x}_{\bar{m}})_i^t, f_{\theta_T}(\mathbf{x}_{\bar{m}}, \mathbf{b})_i^t \right)}_{\text{Distillation Loss}} \right], \quad (2)$$

where  $\alpha \in (0, 1)$  denotes the mixing ratio between the MTM loss and the distillation loss. The entire optimization procedure of the proposed BLEND framework is presented in Alg. 1. After training the student model with privileged knowledge distillation for MTM, it is applied to downstream tasks where only neural activity recordings are available for inference (shown in Fig. 2, right).

While the above algorithm outlines the general framework of BLEND, different implementations of the distillation loss  $\mathcal{L}_{\text{distill}}$  can capture various aspects of the teacher’s knowledge. In this study, we investigate the following four main distillation strategies in our BLEND framework, each designed to transfer certain aspects of the teacher’s knowledge to the student model.

**Hard distillation.** As a baseline, we first implement the  $\mathcal{L}_{\text{distill}}$  with hard distillation strategy, which directly minimizes the mean squared error (MSE) between the teacher and student outputs:

$$\mathcal{L}_{\text{distill}} \left( f_{\theta_S}(\mathbf{x}_{\bar{m}})_i^t, f_{\theta_T}(\mathbf{x}_{\bar{m}}, \mathbf{b})_i^t \right) = \left\| f_{\theta_S}(\mathbf{x}_{\bar{m}})_i^t - f_{\theta_T}(\mathbf{x}_{\bar{m}}, \mathbf{b})_i^t \right\|_2^2 \quad (3)$$

**Soft distillation.** This approach distills knowledge by matching the softened probability distributions of the teacher and student models. We use a temperature parameter  $\tau$  to soften the logits before applying the softmax function:

$$\mathcal{L}_{\text{distill}} \left( f_{\theta_S}(\mathbf{x}_{\bar{m}})_i^t, f_{\theta_T}(\mathbf{x}_{\bar{m}}, \mathbf{b})_i^t \right) = \tau^2 \cdot \text{KL} \left( \sigma \left( \frac{f_{\theta_T}(\mathbf{x}_{\bar{m}}, \mathbf{b})_i^t}{\tau} \right) \parallel \sigma \left( \frac{f_{\theta_S}(\mathbf{x}_{\bar{m}})_i^t}{\tau} \right) \right), \quad (4)$$

where  $\sigma$  is the softmax function,  $\text{KL}(\cdot \parallel \cdot)$  is the Kullback-Leibler divergence, and  $\tau$  is the temperature parameter.

**Feature distillation.** This method aims to align all the intermediate representations of the student model with those of the teacher model.

$$\mathcal{L}_{\text{distill}} \left( f_{\theta_S}(\mathbf{x}_{\bar{m}})_i^t, f_{\theta_T}(\mathbf{x}_{\bar{m}}, \mathbf{b})_i^t \right) = \sum_{l=1}^L \left\| f_{\theta_S}^l(\mathbf{x}_{\bar{m}})_i^t - f_{\theta_T}^l(\mathbf{x}_{\bar{m}}, \mathbf{b})_i^t \right\|_2^2, \quad (5)$$

where  $f_{\theta_S}^l$  and  $f_{\theta_T}^l$  denote the outputs of the  $l$ -th layer of the student and teacher models, respectively.

**Correlation distillation.** This approach focuses on preserving the correlation structure of the teacher’s outputs in the student model. For each sample in the batch, we compute the correlation matrices of the teacher and student outputs and minimize their difference:

$$\mathcal{L}_{\text{distill}} \left( f_{\theta_S}(\mathbf{x}_{\bar{m}})_i^t, f_{\theta_T}(\mathbf{x}_{\bar{m}}, \mathbf{b})_i^t \right) = \frac{1}{B} \sum_{j=1}^B \left\| \text{Corr}(f_{\theta_S}(\mathbf{x}_{\bar{m}})_j) - \text{Corr}(f_{\theta_T}(\mathbf{x}_{\bar{m}}, \mathbf{b})_j) \right\|_2^2, \quad (6)$$

where  $B$  denotes the batch size, and  $\text{Corr}(\cdot)$  computes the correlation matrix of the outputs for the  $j$ -th sample in the batch (see Appendix A.1.2 for details).

## 4 EXPERIMENTS

As shown in Fig. 2, this work includes two benchmarks for evaluating our proposed BLEND framework. The first is a public benchmark for neural latent dynamics model evaluation from Pei et al. (2021), named Neural Latents Benchmark’21 (NLB’21). The second is a recent, public multi-modal neural dataset from Bugeon et al. (2022), which contains calcium imaging recordings of neural population activity as well as single-cell spatial transcriptomics of the recorded tissue. Details of these two benchmarks, tasks, and included baselines are introduced in Section 4.1 and 4.2.

### 4.1 NEURAL POPULATION ACTIVITY ANALYSIS ON NLB’21 BENCHMARK

We include three sub-datasets from NLB’21, *i.e.*, MC-Maze, MC-RTT, and Area2-Bump, for a series of neural dynamics modeling evaluations. These datasets contain neural recordings from monkeys performing various reaching tasks: MC-Maze features delayed reaches through virtual mazes, MC-RTT involves continuous reaches to random targets without delays, and Area2-Bump includes reaches with occasional mechanical perturbations (see Appendix A.2 for details). To evaluate the capability of our proposed BLEND on neural population dynamics modeling, we adopt three tasks from NLB’21, *i.e.*, neural activity prediction, behavior decoding, and matching to peri-stimulus time histograms (PSTHs).

**Neural activity prediction** task aims to predict the neural activity of held-out neurons, measured by metric *Co-bps*, computed as the log-likelihood of held-out neurons’ activity (see Appendix A.3 for detailed computation steps).

**Behavior decoding** task requires the model to relate neural activity to observed behavior. To evaluate this task, we first train a ridge regression model to predict behavioral data from neural firing rates in the training set. We then use this model to predict behavior from neural activity in the test set and measure the accuracy of these predictions using the  $R^2$  score (named *Vel- $R^2$* ).

**Match to PSTHs** task aims to evaluate how well models can capture stereotyped features of neuronal responses across repeated trials of the same condition. To evaluate it, we calculate the  $R^2$  between model-predicted trial-averaged rates and true PSTHs for each neuron across all conditions, then average these  $R^2$  values across neurons (named *PSTH- $R^2$* ).

We include two types of models as baselines for this benchmark. The first solely uses neural activity recordings as inputs, including LRNN (Stolzenburg et al., 2018), LFADS (Pandarinath et al., 2018), NeuralDataTransformer (NDT) (Ye & Pandarinath, 2021), STNDT (Le & Shlizerman, 2022), and MINT (Perkins et al., 2023). The second type utilizes behavior information during training as a prior to facilitate the learning process of neural dynamics modeling, including pi-VAE (Zhou & Wei, 2020), PISD (Sani et al., 2021), and TNDM (Hurwitz et al., 2021). We choose NDT and LFADS as the base model for privileged knowledge distillation using behavior information, with best-distilled model performance reported in Tab. 1. See details of model configurations in Appendix A.4.

### 4.2 TRANSCRIPTOMIC NEURON IDENTITY PREDICTION ON MULTI-MODAL NEURAL ACTIVITY DATASET

This multi-modal dataset combines calcium imaging from mouse primary visual cortex (V1) with single-cell transcriptomics. The dataset includes functional recordings from 9728 neurons across 17 sessions from 4 mice (SB025, SB026, SB028, SB030). Additionally, the dataset provides transcriptomic profiles that are used to categorize neurons as either excitatory or inhibitory. For mouse SB025, about half of the neurons classified as inhibitory are further subdivided into specific subtypes (see details of this dataset in Appendix A.2). We evaluate models on the following two tasks under both multi-animal scenario (all 4 mice) and single-animal scenario (only mouse SB025):

**Excitatory/inhibitory (EI) neuron identity prediction** task is a binary classification task that requires the model to predict the neuron identity, *i.e.*, excitatory or inhibitory.

**Subclass label prediction** task is a 5-class classification task, where the model is required to predict the subclass label of inhibitory neurons, *i.e.*, Lamp5, Pvalb, Vip, Sncg, or Sst.

Following the settings in Mi et al. (2023), we include a random model, PCA (Cunningham & Yu, 2014), UMAP (McInnes et al., 2018), LOLCAT (Schneider et al., 2023a) and its variants, and Ne-

Table 1: Comparison of the proposed **BLEND framework** with other neural dynamics modeling methods on NLB’21 Benchmark (Pei et al., 2021). **Bold values** denote the best performance for the corresponding metric.

| Methods           | MC-Maze                          |                      |                       | MC-RTT               | Area2-Bump           |                       |                       |
|-------------------|----------------------------------|----------------------|-----------------------|----------------------|----------------------|-----------------------|-----------------------|
|                   | Co-bps                           | Vel- $R^2$           | PSTH- $R^2$           | Vel- $R^2$           | Vel- $R^2$           | PSTH- $R^2$           |                       |
| Neural Decoding   | LRNN (Stolzenburg et al., 2018)  | 0.148                | 0.317                 | 0.274                | 0.188                | 0.473                 | 0.085                 |
|                   | MINT (Perkins et al., 2023)      | 0.181                | 0.646                 | 0.165                | 0.159                | 0.370                 | 0.103                 |
|                   | STNDT (Le & Shlizerman, 2022)    | 0.282                | 0.773                 | 0.585                | 0.233                | 0.563                 | 0.416                 |
| Behavior as Prior | pi-VAE (Zhou & Wei, 2020)        | 0.214                | 0.621                 | 0.455                | 0.265                | 0.434                 | 0.305                 |
|                   | RNN PSID (Sani et al., 2021)     | 0.229                | 0.683                 | 0.499                | 0.287                | 0.514                 | 0.372                 |
|                   | TNDM (Hurwitz et al., 2021)      | 0.248                | 0.730                 | 0.509                | 0.345                | 0.677                 | 0.402                 |
| BLEND             | NDT (Ye & Pandarinath, 2021)     | 0.275 (+0.0%)        | 0.779 (+0.0%)         | 0.551 (+0.0%)        | 0.318 (+0.0%)        | 0.519 (+0.0%)         | 0.290 (+0.0%)         |
|                   | NDT-Distill-Best (Ours)          | 0.310 (+12.7%)       | <b>0.891 (+14.4%)</b> | 0.592 (+7.4%)        | 0.372 (+17.0%)       | 0.788 (+51.8%)        | 0.483 (+66.6%)        |
|                   | LFADS (Pandarinath et al., 2018) | 0.315 (+0.0%)        | 0.858 (+0.0%)         | 0.579 (+0.0%)        | 0.416 (+0.0%)        | 0.649 (+0.0%)         | 0.425 (+0.0%)         |
|                   | LFADS-Distill-Best (Ours)        | <b>0.321 (+1.9%)</b> | 0.877 (+2.2%)         | <b>0.604 (+4.3%)</b> | <b>0.429 (+3.1%)</b> | <b>0.837 (+29.0%)</b> | <b>0.615 (+44.7%)</b> |

uPRINT (Mi et al., 2023) as the baseline models for this benchmark. We choose NeuPRINT as the base model for privileged knowledge distillation using behavior information with best-distilled model performance reported in Tab. 2. Detailed model configurations are in Appendix A.4.

## 5 RESULTS AND ANALYSIS

### 5.1 BENCHMARK 1: NEURAL POPULATION ACTIVITY ANALYSIS

Tab. 1 summarizes the results of neural activity prediction, behavior decoding, and match to PSTHs tasks of baseline methods and our proposed method on MC-Maze, MC-RTT, and Area2-Bump datasets. Our behavior-guided distilled NDT and LFADS models achieve the best performance and outperform SOTA methods on all tasks and datasets, demonstrating the effectiveness of our proposed BLEND mechanism.

**Fit to neural activity.** For neural activity prediction of held-out neurons, NDT-Distill-Best achieves 0.310 Co-bps score on the MC-Maze dataset, reporting 12.7% improvement over the base model NDT. LFADS-Distill-Best achieves a 0.321 Co-bps score, reporting the best performance for this task against other baseline models. These observations indicate that our models gain a better understanding of neural population dynamics and yield improved predictions of held-out neural activity.

**Fit to behavior.** For behavior (monkey hand velocity) decoding, NDT-Distill-Best achieves Vel- $R^2$  of 0.891, 0.372, and 0.788 respectively, outperforming the compared baselines. A 51.8% improvement is observed on the Area2-Bump dataset over the base model NDT. While for LFADS-Distill-Best, Vel- $R^2$  scores of 0.877, 0.429, and 0.837 are reported, showcasing better behavior decoding capabilities over baselines and the distilled NDT. Our findings demonstrate that the proposed method achieves a superior correlation between neural activity and behavioral signals compared to existing models. Note that the improvement of distilled LFADS over the base model on MC-Maze and MC-RTT is not as significant as distilled NDT. The potential reason behind this is that LFADS, being RNN-based, may reach its capacity limits with larger datasets, making it harder to incorporate additional knowledge effectively. Meanwhile, LFADS performs dimensionality reduction as part of its model, which might limit its ability to incorporate additional information from the teacher in larger datasets where the intrinsic dimensionality is already well-captured.

**Match to PSTHs.** In the PSTH matching task, our distilled NDT attains PSTH- $R^2$  scores of 0.592 and 0.483 on the MC-Maze and Area2-Bump datasets, respectively. These results represent improvements of 7.4% and a remarkable 66.6% over the baseline model performance. The distilled LFADS model achieves PSTH- $R^2$  scores of 0.604 and 0.615, demonstrating superior performance among all evaluated models and yielding improvements of 4.3% and 44.7% over the base model, respectively. These findings indicate that leveraging behavioral data as privileged knowledge enhances the models’ capacity to reproduce stereotyped neural responses, as quantified by PSTHs.

Table 2: Top-1 accuracy of excitatory/inhibitory neuron identity prediction and inhibitory neuron subclass label prediction tasks on the multimodal population activity dataset from Bugeon et al. (2022). **Bold values** denote the best performance for the corresponding metric.

| Methods                                 | Multiple Animals     |                       | Single Animal        |                       |
|-----------------------------------------|----------------------|-----------------------|----------------------|-----------------------|
|                                         | EI (2 class)         | Subclass (5 class)    | EI (2 class)         | Subclass (5 class)    |
| Random                                  | 0.523                | 0.302                 | 0.488                | 0.260                 |
| PCA (Cunningham & Yu, 2014)             | 0.565                | 0.330                 | 0.572                | 0.263                 |
| UMAP (McInnes et al., 2018)             | 0.520                | 0.340                 | 0.438                | 0.281                 |
| LOLCAT (Schneider et al., 2023a)        | 0.600                | 0.404                 | 0.608                | 0.474                 |
| LOLCAT <sub>ISI</sub> (Mi et al., 2023) | 0.640                | 0.474                 | 0.632                | 0.491                 |
| LOLCAT <sub>Raw</sub> (Mi et al., 2023) | 0.664                | 0.439                 | 0.616                | 0.386                 |
| NeuPRINT (Mi et al., 2023)              | 0.748 (+0.0%)        | 0.495 (+0.0%)         | 0.667 (+0.0%)        | 0.508 (+0.0%)         |
| <b>NeuPRINT-Distill-Best (Ours)</b>     | <b>0.789 (+5.5%)</b> | <b>0.571 (+15.4%)</b> | <b>0.722 (+8.2%)</b> | <b>0.588 (+15.7%)</b> |

Overall, the BLEND framework provides a simple yet effective method that could directly improve the performance of existing NDM models in neural population activity analysis tasks.

## 5.2 BENCHMARK 2: TRANSCRIPTOMIC NEURON IDENTITY PREDICTION

Tab. 2 shows the experimental results of transcriptomic identity prediction tasks, including EI neuron identity prediction and inhibitory neuron subclass label prediction. These two tasks are conducted in both multi-animal and single-animal settings. By incorporating our BLEND framework, the distilled model shows remarkable improvement over the base model and outperforms all baseline methods.

**EI prediction.** In the excitatory/inhibitory neuron identity prediction task, our distilled NeuPRINT model attains the top-1 accuracy of 0.789 and 0.722 in multi-animal and single-animal settings, respectively. These findings demonstrate improvements of 5.5% and 8.2% over the base model. Notably, our proposed method exhibits superior performance, surpassing all other baseline approaches included for comparison.

**Subclass label prediction.** For the inhibitory neuron subclass label prediction task, the distilled NeuPRINT model improves the base model by 15.4% and 15.7% in multi-animal and single-animal settings, respectively, achieving the best top-1 accuracy of 0.571 and 0.588. Given that this task involves a five-class classification problem, the model’s performance metrics are comparatively lower than those observed in the EI prediction task, which is a binary classification problem.

As illustrated in Table 2, the model’s performance metrics in the single-animal setting are comparatively lower than those observed in the multi-animal setting. We posit that the multi-animal scenario provides a more diverse and extensive set of neural activity inputs, thereby enhancing the model’s generalization capabilities. Besides, Mi et al. (2023) points out a data-limited regime in this benchmark characterized by scarce labeled data for transcriptomic prediction, with only a small fraction of neurons having both calcium imaging and transcriptomic data, and an imbalanced distribution across subclasses. Our BLEND framework alleviates this problem and improves the model performance since the teacher model provides regularization and rich knowledge transfer to the student.

## 5.3 ABLATION STUDIES ON BEHAVIOR-GUIDED KNOWLEDGE DISTILLATION STRATEGIES

In this work, we explore different privileged knowledge distillation strategies, including hard distillation, soft distillation, feature distillation, and correlation distillation, as detailed in Section 3.2.1.

**Neural population activity analysis on NLB’21 benchmark.** We find that the NDT-Correlation-Distill model generally performs best across most metrics, showing significant improvements over the baseline NDT. For MC-Maze, NDT-Correlation-Distill achieves the highest  $Vel-R^2$  (0.891).



Table 3: Ablation study on privileged knowledge distillation strategies evaluated by neural dynamics modeling tasks of NLB’21 Benchmark (Pei et al., 2021) and cell class prediction tasks of Bugeon et al. (2022) dataset. **Bold values** denote the best performance for the corresponding metric.

| Neural Population Activity Analysis |                      |                       |                      |                      |                       |                       |
|-------------------------------------|----------------------|-----------------------|----------------------|----------------------|-----------------------|-----------------------|
| Methods                             | MC-Maze              |                       |                      | MC-RTT               | Area2-Bump            |                       |
|                                     | Co-bps               | Vel- $R^2$            | PSTH- $R^2$          | Vel- $R^2$           | Vel- $R^2$            | PSTH- $R^2$           |
| NDT (Ye & Pandarinath, 2021)        | 0.275 (+0.0%)        | 0.779 (+0.0%)         | 0.551 (+0.0%)        | 0.318 (+0.0%)        | 0.519 (+0.0%)         | 0.290 (+0.0%)         |
| NDT-Hard-Distill (Ours)             | 0.290 (+5.5%)        | 0.890 (+14.2%)        | 0.587 (+6.5%)        | 0.380 (+19.5%)       | 0.747 (+43.9%)        | 0.363 (+25.2%)        |
| NDT-Soft-Distill (Ours)             | 0.259 (-5.8%)        | 0.881 (+13.1%)        | 0.491 (-10.9%)       | 0.355 (+11.6%)       | 0.744 (+43.4%)        | 0.318 (+9.7%)         |
| NDT-Feature-Distill (Ours)          | 0.303 (+10.2%)       | 0.888 (+14.0%)        | 0.596 (+8.2%)        | 0.381 (+19.8%)       | 0.787 (+51.6%)        | 0.481 (+65.9%)        |
| NDT-Correlation-Distill (Ours)      | 0.310 (+12.7%)       | <b>0.891 (+14.4%)</b> | 0.592 (+7.4%)        | 0.372 (+17.0%)       | 0.788 (+51.8%)        | 0.483 (+66.6%)        |
| LFADS (Pandarinath et al., 2018)    | 0.315 (+0.0%)        | 0.858 (+0.0%)         | 0.579 (+0.0%)        | 0.416 (+0.0%)        | 0.649 (+0.0%)         | 0.425 (+0.0%)         |
| LFADS-Hard-Distill (Ours)           | <b>0.321 (+1.9%)</b> | 0.877 (+2.2%)         | <b>0.604 (+4.3%)</b> | 0.429 (+3.1%)        | <b>0.837 (+29.0%)</b> | <b>0.615 (+44.7%)</b> |
| LFADS-Soft-Distill (Ours)           | 0.282 (-10.5%)       | 0.800 (-6.8%)         | 0.516 (-10.9%)       | <b>0.443 (+6.5%)</b> | 0.740 (+14.0%)        | 0.576 (+35.5%)        |

  

| EI Neuron Identity & Inhibitory Neuron Subclass Label Prediction |                      |                       |                      |                       |
|------------------------------------------------------------------|----------------------|-----------------------|----------------------|-----------------------|
| Methods                                                          | Multiple Animals     |                       | Single Animal        |                       |
|                                                                  | EI (2 class)         | Subclass (5 class)    | EI (2 class)         | Subclass (5 class)    |
| NeuPRINT (Mi et al., 2023)                                       | 0.748 (+0.0%)        | 0.495 (+0.0%)         | 0.667 (+0.0%)        | 0.508 (+0.0%)         |
| NeuPRINT-Hard-Distill (Ours)                                     | 0.789 (+5.5%)        | <b>0.571 (+15.4%)</b> | 0.714 (+7.0%)        | 0.581 (+14.4%)        |
| NeuPRINT-Soft-Distill (Ours)                                     | 0.782 (+4.5%)        | 0.541 (+9.3%)         | <b>0.722 (+8.2%)</b> | <b>0.588 (+15.7%)</b> |
| NeuPRINT-Feature-Distill (Ours)                                  | 0.781 (+4.4%)        | 0.531 (+7.3%)         | 0.718 (+7.6%)        | 0.524 (+3.6%)         |
| NeuPRINT-Correlation-Distill (Ours)                              | <b>0.792 (+5.9%)</b> | 0.557 (+12.5%)        | 0.705 (+5.7%)        | 0.570 (+12.2%)        |

While for LFADS and its distilled variants, LFADS-Hard-Distill shows improvements over the baseline LFADS, particularly in PSTH- $R^2$  for MC-Maze and Vel- $R^2$  for Area2-Bump. Notably, except for LFADS-Hard-Distill, other distillation methods lead to performance degradation for LFADS on MC-Maze (hence, only results for Soft-Distill are presented in Table 3). This contrasts with the NDT results, where multiple distillation strategies show improvements, indicating that not all knowledge transfer techniques are universally beneficial and highlighting the importance of careful method selection when applying distillation techniques to different models or tasks.

**Transcriptomic identity prediction on multi-modal calcium imaging dataset.** It can be seen that NeuPRINT-Hard-Distill and NeuPRINT-Soft-Distill show consistent improvements over the baseline NeuPRINT across all tasks. NeuPRINT-Correlation-Distill performs best for Multiple Animals EI prediction. NeuPRINT-Soft-Distill excels in Single Animal predictions for both EI and Subclass.

Overall, the distillation strategies, particularly Hard-Distill and Correlation-Distill, tend to outperform their respective baselines, suggesting that privileged knowledge distillation can significantly enhance neural dynamics modeling. Different distillation strategies seem to be more effective for different tasks and metrics, indicating that the choice of distillation method should be task-specific.

#### 5.4 QUALITATIVE ANALYSIS

We visualized the decoded behavior trajectories of the base model and our distilled model for comparison in Fig. 3. Subfigure (a) shows the comparison between predicted and ground truth 2D hand movement on MC-Maze for NDT (base model) and NDT-Hard-Distill (our distilled model). And subfigure (b) illustrates the 1D hand velocity over time for both the X and Y axes separately. For a more comprehensive visualization and qualitative analysis, please refer to Appendix A.5 and A.6.

**2D hand movement trajectory decoding.** For NDT the base model, the predicted trajectory follows the general U-shape of the ground truth but shows significant deviations, especially at the bottom of the U and the upper right corner. While our distilled model generates a trajectory that aligns much more closely with the ground truth. It captures the U-shape more accurately, especially at the bottom curve and the endpoints, showing a marked improvement in behavior decoding.

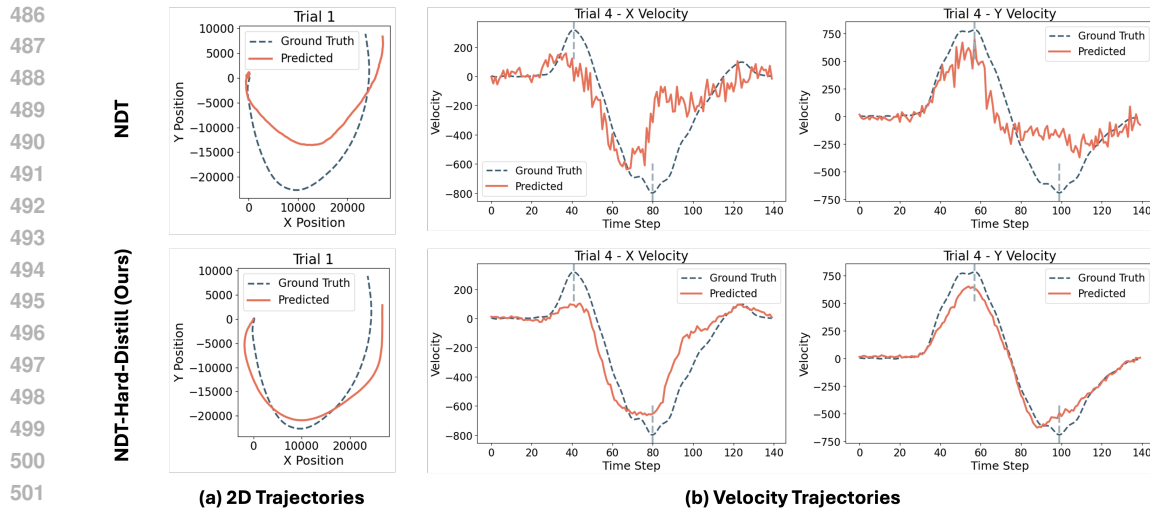

Figure 3: Visualization of behavior decoding on MC-Maze dataset. (a) Prediction and ground truth of 2D hand movement trajectory. (b) Prediction and ground truth of X and Y velocities, respectively.

**1D hand velocity decoding (X and Y axes).** For both X and Y velocities, the base model struggles to accurately capture the magnitude and timing of velocity changes in both dimensions. Specifically, it underestimates peak velocities and shows erratic fluctuations in X velocity, and shows substantial deviations from ground truth in Y velocity, particularly after time step 60. While our distilled NDT significantly enhances velocity predictions in both X and Y directions. It more accurately captures the magnitude, timing, and overall pattern of velocity changes with improved smoothness, suggesting a better understanding of the hand movement dynamics.

## 6 CONCLUSION AND DISCUSSION

In this study, we introduce BLEND, a novel framework for neural population dynamics modeling that leverages privileged knowledge distillation. Predicated on the fundamental premise that behavioral data can serve as an explicit guide for neural representation learning, we present a model-agnostic framework that facilitates seamless integration with diverse existing neural dynamics modeling architectures. This versatility enables the enhancement of a wide range of computational approaches in the field of computational neuroscience. Comprehensive empirical evaluations, encompassing neural population activity analysis and transcriptomic identity prediction tasks, substantiate the superior effectiveness of our proposed framework. BLEND demonstrates a remarkable capacity for capturing implicit patterns within neural activity, consistently outperforming state-of-the-art models by a significant margin, thereby providing new perspectives on how behavioral observations can be leveraged to guide the complex modeling of neuronal population dynamics.

Although the initial results of BLEND are promising, a few limitations remain to be addressed. In this work, we employ a straightforward approach to implement the behavior guidance by concatenating the neural activity and behavior information along the feature dimension (assuming they have the same length of time steps). This methodological choice is motivated by the relatively low-dimensional nature of behavioral signals, which precludes their use as an independent guidance source (*e.g.*, as a query in the cross-attention mechanism). However, this simplistic guidance strategy may not fully capture the intricate relationship between neural activity and behavior. Future research should investigate advanced integration methods to better utilize the complex interactions between these data types, potentially improving the model’s ability to represent subtle neural patterns. Moreover, while the current study focuses on temporal behavioral signals that correspond directly with neural activity at each time step, future research should aim to extend BLEND to more generalized settings. This expansion could encompass non-temporal or discrete behavioral signals, thereby broadening the framework’s applicability to diverse neuroscientific domains. Such extensions could prove valuable in investigating sleep stages, categorizing social behaviors, and exploring other scenarios where behavior is not continuously paired with neural activity. This generalization would significantly enhance the versatility and utility of BLEND across a wider spectrum of neuroscience research paradigms.

## REPRODUCIBILITY STATEMENT

To enhance the reproducibility of this study, we provide an Appendix section comprising six subsections that offer detailed supplementary information. Appendix A.1 presents the pseudo-code of our proposed BLEND framework, followed by a comprehensive explanation of the behavior-guided knowledge distillation strategies. Additionally, Appendix A.2 provides detailed descriptions of the datasets utilized, namely MC-Maze, MC-RTT, Area2-Bump, and the multi-modal neural activity datasets. To facilitate a deeper understanding of the tasks conducted in this study, Appendix A.3 elucidates the specifics of neural activity prediction, behavior decoding, and match to PSTHs tasks. Subsequently, Appendix A.4 delineates the model configurations, including architecture and hyperparameters. To further elucidate the superior performance of our proposed method, Appendices A.5 and A.6 offer additional visualizations comparing different base models for distillation and various distillation strategies, enabling qualitative assessment. Our source code will be made publicly accessible upon acceptance of this paper.

## REFERENCES

- Muhammad Haseeb Aslam, Muhammad Osama Zeeshan, Marco Pedersoli, Alessandro L Koerich, Simon Bacon, and Eric Granger. Privileged knowledge distillation for dimensional emotion recognition in the wild. In *Proceedings of the IEEE/CVF conference on computer vision and pattern recognition*, pp. 3338–3347, 2023.
- Stephane Bugeon, Joshua Duffield, Mario Dipoppa, Anne Ritoux, Isabelle Prankerd, Dimitris Nicoloutsopoulos, David Orme, Maxwell Shinn, Han Peng, Hamish Forrest, et al. A transcriptomic axis predicts state modulation of cortical interneurons. *Nature*, 607(7918):330–338, 2022.
- Cheng Chen, Qi Dou, Yueming Jin, Quande Liu, and Pheng Ann Heng. Learning with privileged multimodal knowledge for unimodal segmentation. *IEEE transactions on medical imaging*, 41(3):621–632, 2021.
- Raeed H Chowdhury, Joshua I Glaser, and Lee E Miller. Area 2 of primary somatosensory cortex encodes kinematics of the whole arm. *Elife*, 9:e48198, 2020.
- Mark M Churchland, John P Cunningham, Matthew T Kaufman, Stephen I Ryu, and Krishna V Shenoy. Cortical preparatory activity: representation of movement or first cog in a dynamical machine? *Neuron*, 68(3):387–400, 2010.
- Mark M Churchland, John P Cunningham, Matthew T Kaufman, Justin D Foster, Paul Nuyujukian, Stephen I Ryu, and Krishna V Shenoy. Neural population dynamics during reaching. *Nature*, 487(7405):51–56, 2012.
- John P Cunningham and Byron M Yu. Dimensionality reduction for large-scale neural recordings. *Nature neuroscience*, 17(11):1500–1509, 2014.
- Patrick J Drew, Celine Mateo, Kevin L Turner, Xin Yu, and David Kleinfeld. Ultra-slow oscillations in fmri and resting-state connectivity: neuronal and vascular contributions and technical confounds. *Neuron*, 107(5):782–804, 2020.
- Yuanjun Gao, Evan W Archer, Liam Paninski, and John P Cunningham. Linear dynamical neural population models through nonlinear embeddings. *Advances in neural information processing systems*, 29, 2016.
- Cole Hurwitz, Akash Srivastava, Kai Xu, Justin Jude, Matthew Perich, Lee Miller, and Matthias Hennig. Targeted neural dynamical modeling. *Advances in Neural Information Processing Systems*, 34:29379–29392, 2021.
- Justin Jude, Matthew G. Perich, Lee E. Miller, and Matthias H. Hennig. Robust alignment of cross-session recordings of neural population activity by behavior via unsupervised domain adaptation. *International Conference on Machine Learning*, 2022.
- James J Jun, Nicholas A Steinmetz, Joshua H Siegle, Daniel J Denman, Marius Bauza, Brian Barbarits, Albert K Lee, Costas A Anastassiou, Alexandru Andrei, Çağatay Aydın, et al. Fully integrated silicon probes for high-density recording of neural activity. *Nature*, 551(7679):232–236, 2017.

- 594 Dmitry Kobak, Wieland Brendel, Christos Constantinidis, Claudia E Feierstein, Adam Kepecs,  
595 Zachary F Mainen, Xue-Lian Qi, Ranulfo Romo, Naoshige Uchida, and Christian K Machens.  
596 Demixed principal component analysis of neural population data. *elife*, 5:e10989, 2016.  
597
- 598 Trung Le and Eli Shlizerman. Stndt: Modeling neural population activity with spatiotemporal trans-  
599 formers. *Advances in Neural Information Processing Systems*, 35:17926–17939, 2022.
- 600 Liyang Liu, Zihan Wang, Minh Hieu Phan, Bowen Zhang, Jinchao Ge, and Yifan Liu. Bpkd:  
601 Boundary privileged knowledge distillation for semantic segmentation. In *Proceedings of the*  
602 *IEEE/CVF Winter Conference on Applications of Computer Vision*, pp. 1062–1072, 2024.  
603
- 604 Ran Liu, Mehdi Azabou, Max Dabagia, Jingyun Xiao, and Eva Dyer. Seeing the forest and the tree:  
605 Building representations of both individual and collective dynamics with transformers. *Advances*  
606 *in neural information processing systems*, 35:2377–2391, 2022.
- 607 Jakob H Macke, Lars Buesing, John P Cunningham, Byron M Yu, Krishna V Shenoy, and Maneesh  
608 Sahani. Empirical models of spiking in neural populations. *Advances in neural information*  
609 *processing systems*, 24, 2011.
- 610 Joseph G Makin, Joseph E O’Doherty, Mariana MB Cardoso, and Philip N Sabes. Superior arm-  
611 movement decoding from cortex with a new, unsupervised-learning algorithm. *Journal of neural*  
612 *engineering*, 15(2):026010, 2018.
- 613 Leland McInnes, John Healy, and James Melville. Umap: Uniform manifold approximation and  
614 projection for dimension reduction. *arXiv preprint arXiv:1802.03426*, 2018.
- 615 Lu Mi, Trung Le, Tianxing He, Eli Shlizerman, and Uygur Sümbül. Learning time-invariant rep-  
616 resentations for individual neurons from population dynamics. *Advances in Neural Information*  
617 *Processing Systems*, 36:46007–46026, 2023.
- 618 Erfan Nozari, Maxwell A Bertolero, Jennifer Stiso, Lorenzo Caciagli, Eli J Cornblath, Xiaosong  
619 He, Arun S Mahadevan, George J Pappas, and Dani S Bassett. Macroscopic resting-state brain  
620 dynamics are best described by linear models. *Nature biomedical engineering*, 8(1):68–84, 2024.
- 621 Joseph E O’Doherty, Mariana MB Cardoso, Joseph G Makin, and Philip N Sabes. Nonhuman  
622 primate reaching with multichannel sensorimotor cortex electrophysiology. *Zenodo* <http://doi.org/10.5281/zenodo.583331>, 2017.
- 623 Chethan Pandarinath, Daniel J O’Shea, Jasmine Collins, Rafal Jozefowicz, Sergey D Stavisky,  
624 Jonathan C Kao, Eric M Trautmann, Matthew T Kaufman, Stephen I Ryu, Leigh R Hochberg,  
625 et al. Inferring single-trial neural population dynamics using sequential auto-encoders. *Nature*  
626 *methods*, 15(10):805–815, 2018.
- 627 Felix Pei, Joel Ye, David M. Zoltowski, Anqi Wu, Raed H. Chowdhury, Hansem Sohn, Joseph E.  
628 O’Doherty, Krishna V. Shenoy, Matthew T. Kaufman, Mark Churchland, Mehrdad Jazayeri,  
629 Lee E. Miller, Jonathan Pillow, Il Memming Park, Eva L. Dyer, and Chethan Pandarinath. Neu-  
630 ral latents benchmark ’21: Evaluating latent variable models of neural population activity. In  
631 *Advances in Neural Information Processing Systems (NeurIPS), Track on Datasets and Bench-*  
632 *marks*, 2021. URL <https://arxiv.org/abs/2109.04463>.
- 633 Sean M. Perkins, John P. Cunningham, Qi Wang, and Mark M. Churchland. Simple decoding of  
634 behavior from a complicated neural manifold. *eLife*, October 2023. doi: 10.7554/elife.89421.1.  
635
- 636 Omid G Sani, Hamidreza Abbaspourzad, Yan T Wong, Bijan Pesaran, and Maryam M Shanechi.  
637 Modeling behaviorally relevant neural dynamics enabled by preferential subspace identification.  
638 *Nature Neuroscience*, 24(1):140–149, 2021.
- 639 Aidan Schneider, Mehdi Azabou, Louis McDougall-Vigier, David F Parks, Sahara Ensley, Kiran  
640 Bhaskaran-Nair, Tomasz Nowakowski, Eva L Dyer, and Keith B Hengen. Transcriptomic cell  
641 type structures in vivo neuronal activity across multiple timescales. *Cell reports*, 42(4), 2023a.  
642
- 643 Steffen Schneider, Jin H Lee, and Mackenzie W Mathis. Learnable latent embeddings for joint be-  
644 havioural and neural analysis. *Nature*, 2023b. doi: <https://doi.org/10.1038/s41586-023-06031-6>.

648 Ian H Stevenson and Konrad P Kording. How advances in neural recording affect data analysis.  
649 *Nature neuroscience*, 14(2):139–142, 2011.  
650

651 Frieder Stolzenburg, Sandra Litz, Olivia Michael, and Oliver Obst. The power of linear recurrent  
652 neural networks. *arXiv preprint arXiv:1802.03308*, 2018.

653 Vladimir Vapnik and Akshay Vashist. A new learning paradigm: Learning using privileged infor-  
654 mation. *Neural networks*, 22(5-6):544–557, 2009.  
655

656 Shuo Yang, Sujay Sanghavi, Holakou Rahmanian, Jan Bakus, and Vishwanathan SVN. Toward  
657 understanding privileged features distillation in learning-to-rank. *Advances in Neural Information  
658 Processing Systems*, 35:26658–26670, 2022.

659 Joel Ye and Chethan Pandarinath. Representation learning for neural population activity with Neural  
660 Data Transformers. *Neurons, Behavior, Data analysis, and Theory*, August 2021. ISSN 2690-  
661 2664. doi: 10.51628/001c.27358.  
662

663 Ding Zhou and Xue-Xin Wei. Learning identifiable and interpretable latent models of high-  
664 dimensional neural activity using pi-vae. *Advances in Neural Information Processing Systems*,  
665 33:7234–7247, 2020.  
666  
667  
668  
669  
670  
671  
672  
673  
674  
675  
676  
677  
678  
679  
680  
681  
682  
683  
684  
685  
686  
687  
688  
689  
690  
691  
692  
693  
694  
695  
696  
697  
698  
699  
700  
701

## A APPENDIX

### A.1 SUPPLEMENTARY CONTENTS OF BLEND ALGORITHM

#### A.1.1 BLEND ALGORITHM

---

**Algorithm 1** Behavior-guided Teacher-Student Knowledge Distillation Framework (BLEND)
 

---

**Require:** Training data  $\mathcal{D} = \{(\mathbf{x}_i, \mathbf{b}_i)\}_{i=1}^N$ , Teacher model  $f_{\theta_T}$ , Student model  $f_{\theta_S}$

**Ensure:** Trained student model  $f_{\theta_S}$

- 1: // Train teacher model
- 2: Initialize teacher model parameters  $\theta_T$
- 3: **for** each epoch **do**
- 4:   **for** each batch  $(\mathbf{x}_b, \mathbf{b}_b)$  in  $\mathcal{D}$  **do**
- 5:     Generate random mask  $\mathbf{m}_b \sim p(\mathbf{m})$
- 6:     Apply the generated mask  $\mathbf{m}_b$  to original input  $\mathbf{x}_b$
- 7:     Create unmasked portions  $\mathbf{x}_{\bar{m}_b}$
- 8:      $\hat{\mathbf{x}}_b \leftarrow f_{\theta_T}(\mathbf{x}_{\bar{m}_b}, \mathbf{b}_b)$  ▷ Teacher’s predictions
- 9:     Compute  $\mathcal{L}_{\text{MTM}}$  using Eq. (1)
- 10:     Update  $\theta_T$  using  $\nabla \mathcal{L}_{\text{MTM}}$
- 11:   **end for**
- 12: **end for**
- 13: // Train student model
- 14: Initialize student model parameters  $\theta_S$
- 15: **for** each epoch **do**
- 16:   **for** each batch  $(\mathbf{x}_b, \mathbf{b}_b)$  in  $\mathcal{D}$  **do**
- 17:     Generate random mask  $\mathbf{m}_b \sim p(\mathbf{m})$
- 18:     Apply the generated mask  $\mathbf{m}_b$  to original input  $\mathbf{x}_b$
- 19:     Create unmasked portions  $\mathbf{x}_{\bar{m}_b}$
- 20:      $\mathbf{z}_T \leftarrow f_{\theta_T}(\mathbf{x}_{\bar{m}_b}, \mathbf{b}_b)$  ▷ Teacher’s predictions
- 21:      $\mathbf{z}_S \leftarrow f_{\theta_S}(\mathbf{x}_{\bar{m}_b})$  ▷ Student’s predictions
- 22:     Compute  $\mathcal{L}_{\text{distill}}$  using Eq. (2):
- 23:      $\mathcal{L}_{\text{KD}} \leftarrow \alpha \mathcal{L}_{\text{MTM}}(\mathbf{z}_S, \mathbf{x}_b) + (1 - \alpha) \mathcal{L}_{\text{distill}}(\mathbf{z}_S, \mathbf{z}_T)$   
▷ Distillation loss  $\mathcal{L}_{\text{distill}}$  chosen from one of Eq. (3), (4), (5), or (6)
- 24:     Update  $\theta_S$  using  $\nabla \mathcal{L}_{\text{KD}}$
- 25:   **end for**
- 26: **end for**
- 27: **return**  $f_{\theta_S}$

---

#### A.1.2 DISTILLATION STRATEGIES.

**Correlation-Distill.** As shown in Section 3.2.1, this distillation strategy aims to preserve the correlation structure of the teacher’s outputs. Concretely, the correlation matrix is computed as:

$$\text{Corr}(\mathbf{Y}) = \frac{(\mathbf{Y} - \bar{\mathbf{Y}})(\mathbf{Y} - \bar{\mathbf{Y}})^T}{\sqrt{\text{diag}((\mathbf{Y} - \bar{\mathbf{Y}})(\mathbf{Y} - \bar{\mathbf{Y}})^T) \cdot \text{diag}((\mathbf{Y} - \bar{\mathbf{Y}})(\mathbf{Y} - \bar{\mathbf{Y}})^T)^T}} \quad (7)$$

Here,  $\mathbf{Y} \in \mathbb{R}^{N \times T}$  represents the output of either the student or teacher model for a single sample, with  $N$  being the number of neurons and  $T$  the number of time steps.  $\bar{\mathbf{Y}}$  is the mean of  $\mathbf{Y}$  along the time dimension, and  $\text{diag}(\cdot)$  extracts the diagonal of a matrix. The resulting correlation matrix has dimensions  $N \times N$ . Note that we use the Frobenius norm  $\|\cdot\|_F$  to compute the difference between correlation matrices, as it provides a scalar measure of the overall difference between these matrices.

### A.2 SUPPLEMENTARY CONTENTS OF DATASETS INCLUDED

**MC-Maze** dataset (Churchland et al., 2010; 2012) comprises recordings from the primary motor and dorsal premotor cortices of a monkey performing instructed-delay reaching tasks in 108 different configurations, involving various target positions and virtual barriers. This dataset includes one full session with 2,869 trials and 182 neurons, along with hand kinematics. This dataset is notable for

its behavioral richness, stereotyped repetitions, high trial counts, and clean separation of preparation and execution phases, making it valuable for studying neural population dynamics during movement.

**MC-RTT** dataset (O’Doherty et al., 2017; Makin et al., 2018) features motor cortical recordings during a random target task, comprising continuous, point-to-point reaches with variable lengths and locations, without delay periods. It spans 15 minutes of continuous reaching, artificially divided into 1,351 600ms trials, and includes data from 130 neurons along with simultaneous hand kinematics. Unlike the MC-Maze dataset, MC-RTT introduces modeling challenges due to its non-stereotyped movements, lack of trial repetitions, and the unpredictability of random data snippets, precluding simple trial-averaging approaches for de-noising. This dataset tests models’ ability to infer latent representations from single-trial data and detect unpredictable inputs to population activity, offering a more naturalistic benchmark for latent variable models.

**Area2-Bump** dataset (Chowdhury et al., 2020) contains neural recordings from area 2 of the somatosensory cortex, which processes proprioceptive information, as a monkey performed a visually-guided reaching task using a manipulandum. It comprises 462 trials with data from 65 neurons, along with hand kinematics and perturbation information, where in 50% of random trials, the monkey’s arm was unexpectedly bumped before the reach cue. This dataset challenges models to infer inputs describing activity after sensory perturbations and to perform robustly with low neuron counts, offering insights into the distinct dynamics of somatosensory areas compared to motor areas.

For each of the above datasets, neural activity recordings are counted in 5ms bins, and behavior signals are also measured at 5ms intervals. Other preprocessing information can be found in Pei et al. (2021)<sup>2</sup> or Ye & Pandarinath (2021)<sup>3</sup>.

**Multi-model neural activity dataset** collected by Bugeon et al. (2022) combines neural recordings, genetic information, and behavioral data from mice. This comprehensive dataset includes calcium imaging from the primary visual cortex of four mice (SB025, SB026, SB028, SB030), encompassing over 9,700 neurons across 17 recording sessions. Each session captures roughly 500 neurons for about 20 minutes at a sampling rate of 4.3 Hz. The genetic component comprises expression data for 72 specific genes, enabling the classification of neurons into excitatory or inhibitory types, with further subtyping available for a portion of inhibitory neurons in one mouse (SB025). Complementing the neural data are behavioral recordings such as running speed and pupil dilation, as well as overall brain state classifications. The dataset also provides spatial information for the recorded neurons, offering a rich resource for investigating the interplay between neural activity, cell types, and behavior.

For the preprocessing details of this dataset, please refer to Mi et al. (2023).<sup>4</sup>

### A.3 SUPPLEMENTARY CONTENTS OF TASKS INCLUDED

**Neural activity prediction.** This task requires the model to predict neural activity for held-out neurons. *Co-bps*, also named *Co-smoothing*, is the primary evaluation metric used in the NLB’21 to assess how well models can predict held-out neural activity. The test data is split into held-in and held-out neurons, with models using the training data and held-in test neurons to predict firing rates  $\lambda$  for the held-out test neurons. Performance is measured using log-likelihood under a Poisson observation model:

$$p(\hat{\mathbf{y}}_{n,t}) = \text{Poisson}(\hat{\mathbf{y}}_{n,t}; \lambda_{n,t}),$$

where  $\hat{\mathbf{y}}_{n,t}$  is the held-out spike count for neuron  $n$  at time  $t$ . The log-likelihood  $\mathcal{L}(\lambda; \hat{\mathbf{y}})$  is summed over all held-out neurons and time points, then normalized to “bits per spike” by comparing to a baseline model that uses only the mean firing rate of each neuron:

$$\text{bits/spike} = \frac{1}{n_{sp}} \log_2 (\mathcal{L}(\lambda; \hat{\mathbf{y}}_{n,t}) - \mathcal{L}(\bar{\lambda}_n; \hat{\mathbf{y}}_{n,t})),$$

where  $\bar{\lambda}_n$  is the mean firing rate for neuron  $n$  and  $n_{sp}$  is its total number of spikes. A positive bits per spike (bps) score indicates the model predicts time-varying activity better than the mean firing rate baseline. The co-smoothing metric allows standardized comparison across different types of

<sup>2</sup>[https://github.com/neurallatents/nlb\\_tools/tree/main](https://github.com/neurallatents/nlb_tools/tree/main)

<sup>3</sup><https://github.com/snel-repo/neural-data-transformers>

<sup>4</sup><https://github.com/lumimim/NeuPRINT>

810 models and neural datasets, as it only requires models to output predicted firing rates rather than  
 811 imposing constraints on model architecture or training (Pei et al., 2021).  
 812

813 **Behavior decoding.** As mentioned in Section 4.1, following the settings in Pei et al. (2021); Ye &  
 814 Pandarinath (2021), we evaluate the performance of behavior decoding by fitting a ridge regression  
 815 model. This linear mapping is enforced for all models in the decoding process to prevent complex  
 816 decoders from compensating for poor neural dynamics estimation. More sophisticated decoders  
 817 could potentially achieve better performance but at the cost of obscuring the quality of the underlying  
 818 latent representations. The behavioral data used for decoding in MC-Maze, MC-RTT, and Area2-  
 819 Bump is monkey hand velocity.

820 **Match to PSTHs.** This task evaluates how well models can reproduce the stereotyped neural re-  
 821 sponses captured by peri-stimulus time histograms (PSTHs). PSTHs are computed by averaging  
 822 neuronal responses across trials within a given condition, revealing consistent features of neural ac-  
 823 tivity. For datasets with clear trial structures (MC-Maze and Area2-Bump), the task computes the  
 824  $R^2$  between trial-averaged model rate predictions for each condition and the true PSTHs, first for  
 825 each neuron across all conditions and then averaged across neurons.  
 826

#### 827 A.4 SUPPLEMENTARY CONTENTS OF MODEL CONFIGURATIONS

828  
 829 **LFADS (Latent Factor Analysis via Dynamical Systems)** (Pandarinath et al., 2018) is a deep  
 830 learning method designed to model neural population dynamics from single-trial spiking data, which  
 831 utilizes recurrent neural networks (RNNs) to model the underlying dynamics of neural populations.  
 832 The model consists of an encoder RNN that compresses the input spike data into a latent code,  
 833 and a generator RNN that reconstructs the data from this latent representation. LFADS infers  
 834 low-dimensional latent factors and initial conditions for each trial, which are then used to gener-  
 835 ate de-noised estimates of neural firing rates. This architecture allows LFADS to capture complex,  
 836 non-linear dynamics in neural data while providing interpretable latent representations of neural  
 837 population activity on single trials.

838 As the base model for our privileged knowledge distillation with behavior information in neural  
 839 dynamics modeling, we set the hidden dimension to 64 and factor size to 32. For model training, we  
 840 set the batch size to 64, learning rate to  $1 \times 10^{-3}$  with 5000 warm-up iterations and weight decay to  
 841  $5 \times 10^{-5}$ . Mask ratio is set to 0.25.

842 **NDT (NeuralDataTransformer)** (Ye & Pandarinath, 2021) is a non-recurrent architecture designed  
 843 to model neural population spiking activity, based on the BERT encoder. The core of the NDT con-  
 844 sists of a stack of Transformer layers (typically 6 layers), each containing self-attention mechanisms,  
 845 layer normalization, and feedforward neural networks. It uses masked modeling during training,  
 846 where random portions of the input sequence are masked and the model is trained to reconstruct the  
 847 original input, encouraging it to leverage contextual information. The NDT processes neural data in  
 848 parallel rather than sequentially, enabling faster inference times compared to recurrent models like  
 849 LFADS, while achieving comparable performance in modeling autonomous neural dynamics and  
 850 enabling accurate behavioral decoding.

851 As the base model for our behavior-guided knowledge distillation in neural dynamics modeling, we  
 852 set the Transformer layer number to 4 for MC-Maze, MC-RTT, and Area2-Bump datasets, hidden  
 853 dimension to 128, and number of attention heads to 2. For model training, we set the batch size to  
 854 64, learning rate to  $1 \times 10^{-3}$  with 5000 warm-up iterations and weight decay to  $5 \times 10^{-5}$ . Mask  
 855 ratio is set to 0.25.

856 **NeuPRINT** (Mi et al., 2023) is designed to assign time-invariant representations to individual neu-  
 857 rons based on population recordings of neural activity. The model uses a transformer architecture  
 858 to implement an implicit dynamical system that predicts neural activity based on the past activity  
 859 of the neuron itself and permutation-invariant statistics of the population activity. NeuPRINT learns  
 860 both the dynamical model and time-invariant representations for each neuron by minimizing the pre-  
 861 diction error of future neural activity. The learned representations can then be used for downstream  
 862 tasks such as predicting transcriptomic cell types.

863 As the base model for our behavior-guided knowledge distillation in transcriptomic identity predic-  
 tion, we follow the same configurations in Mi et al. (2023) and set the dimension of time-invariant



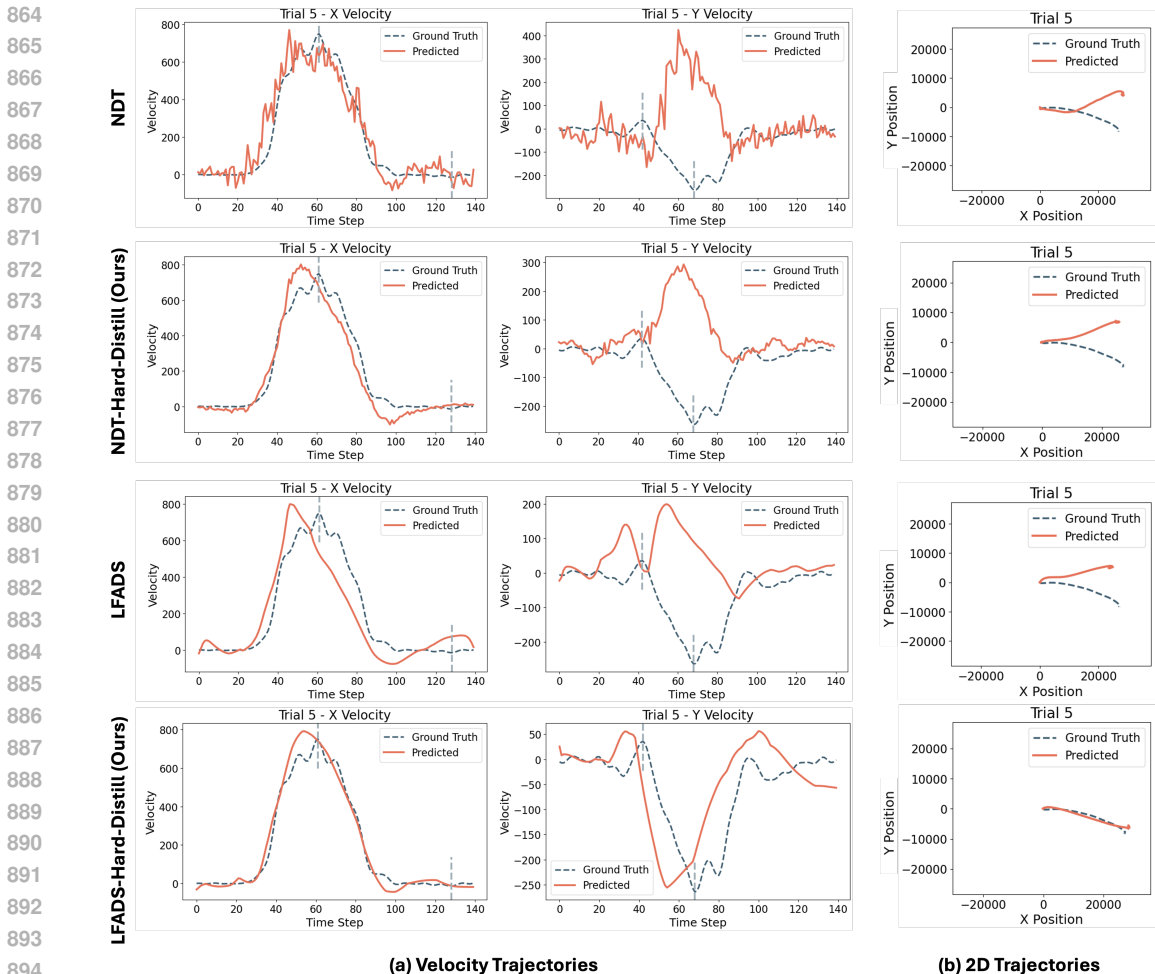

Figure 4: Visualization of predicted hand velocity on MC-Maze dataset of base model NDT and LFADS, as well as their behavior-guided distilled counterparts. (a) Prediction and ground truth of X and Y velocities, respectively. (b) Prediction and ground truth of 2D hand movement trajectories.

embedding to 64. For model architecture, 1 transformer layer with 2 attention heads is used. For model training, the batch size is set to 1024 and the learning rate is set to  $1 \times 10^{-3}$ .

#### A.5 ADDITIONAL QUALITATIVE ANALYSIS ON NDT AND LFADS

This section provides more qualitative analysis based on visualization of model predictions in the behavior decoding task. As shown in Fig. 4, a comprehensive visualization comparing the performance of base models (NDT and LFADS) with their behavior-guided distilled versions (NDT-Hard-Distill and LFADS-Hard-Distill) on the MC-Maze dataset is presented.

##### A.5.1 1D HAND VELOCITY DECODING (X AND Y AXES)

Fig. 4(a) shows the decoded X and Y hand velocities compared to the ground truths.

**NDT vs. NDT-Hard-Distill:** The distilled NDT model demonstrates significant improvements in capturing both X and Y velocity components simultaneously. The base NDT model shows considerable deviations from the ground truth, particularly in the latter half of the time series. In contrast, NDT-Hard-Distill tracks both velocity components much more accurately throughout the entire se-

918 quence. It better captures the magnitude and timing of velocity changes in both dimensions, resulting  
 919 in a much closer match to the ground truth trajectory.

920 **LFADS vs. LFADS-Hard-Distill:** Both LFADS and the distilled model perform well in tracking  
 921 the X and Y velocities, but the distilled version shows noticeable improvements. LFADS-Hard-  
 922 Distill more accurately captures the peaks and troughs of both velocity components, especially in  
 923 the middle and latter parts of the sequence. The refinements are subtle but consistent, indicating a  
 924 better overall representation of the hand movement dynamics. Notably, in the trough region of the Y  
 925 velocity component, NDT, NDT-Hard-Distill, and LFADS exhibit a significant mischaracterization  
 926 of the velocity profile, predicting a peak where the ground truth demonstrates a trough. In contrast,  
 927 LFADS-Hard-Distill accurately captures this critical feature, successfully predicting the trough trend  
 928 in concordance with the ground truth.

### 930 A.5.2 2D HAND MOVEMENT TRAJECTORY DECODING

931 Fig. 4(b) presents a comparison of 2D hand movement trajectories for four models: NDT (base  
 932 model), NDT-Hard-Distill (our distilled model), LFADS (base model), and LFADS-Hard-Distill  
 933 (our distilled model), alongside the ground truth trajectory.

934 For NDT, NDT-Hard-Distill, and LFADS, there’s a significant discrepancy between the ground truth  
 935 and predicted trajectories. While the ground truth curves downward, the predictions curve upward,  
 936 indicating poor performance or a fundamental misunderstanding of the underlying pattern. For  
 937 LFADS-Hard-Distill, the predicted trajectory closely follows the ground truth, suggesting much  
 938 better performance for this model. Moreover, LFADS-Hard-Distill appears to have successfully  
 939 learned the system’s behavior, demonstrating superior predictive capabilities.

### 942 A.5.3 COMPARATIVE ANALYSIS

943 Overall, we can conclude that the distillation process benefits both NDT and LFADS, with more  
 944 pronounced improvements observed in the NDT model. The distillation process enhances the mod-  
 945 els’ ability to capture fine-grained details and reduce erratic predictions, resulting in smoother, more  
 946 accurate velocity profiles. Meanwhile, LFADS-Hard-Distill demonstrates superior performance in  
 947 accurately predicting the trough region, as illustrated in Fig. 4(a), and in capturing the trajectory  
 948 trend, as shown in Fig. 4(b). In both instances, the other three models exhibit significant deviations  
 949 from the ground truth. This qualitative observation aligns with the quantitative results presented in  
 950 Tab. 3, wherein LFADS-Hard-Distill consistently outperforms the other three models in behavior  
 951 decoding.

952 These visualizations provide strong evidence for the effectiveness of the BLEND framework in  
 953 improving neural dynamics modeling. Moreover, the distillation process appears to transfer valuable  
 954 information from the behavior-guided teacher model to the student model, enhancing its ability to  
 955 infer accurate hand velocities in multiple dimensions from neural activity alone. The improvements  
 956 are consistent across different aspects of the movement (2D movement trajectories, 1D X and Y  
 957 velocities), suggesting a comprehensive enhancement of the models’ predictive capabilities.

958 In summary, this analysis demonstrates that the BLEND framework not only improves quantita-  
 959 tive metrics but also leads to qualitatively better predictions of complex behavioral outputs from  
 960 neural activity. These visualizations provide intuitive and compelling evidence for the benefits of  
 961 incorporating behavioral information through privileged knowledge distillation in neural dynamics  
 962 modeling.

## 965 A.6 ADDITIONAL QUALITATIVE ANALYSIS ON DIFFERENT DISTILLATION STRATEGIES

966 This section presents the qualitative analysis of different distillation strategies we employ in this  
 967 work, including Hard Distillation (Eq. 3), Soft Distillation (Eq. 4), Feature Distillation (Eq. 5),  
 968 and Correlation Distillation (Eq. 6). This analysis is conducted based on the visualization of model  
 969 predictions in the behavior decoding task of the MC-Maze dataset. As illustrated in Fig. 5, we  
 970 compare the performance of NDT and its different behavior-guided distilled variants in decoding  
 971 hand movement trajectories and velocities.

972  
 973  
 974  
 975  
 976  
 977  
 978  
 979  
 980  
 981  
 982  
 983  
 984  
 985  
 986  
 987  
 988  
 989  
 990  
 991  
 992  
 993  
 994  
 995  
 996  
 997  
 998  
 999  
 1000  
 1001  
 1002  
 1003  
 1004  
 1005  
 1006  
 1007  
 1008  
 1009  
 1010  
 1011  
 1012  
 1013  
 1014  
 1015  
 1016  
 1017  
 1018  
 1019  
 1020  
 1021  
 1022  
 1023  
 1024  
 1025

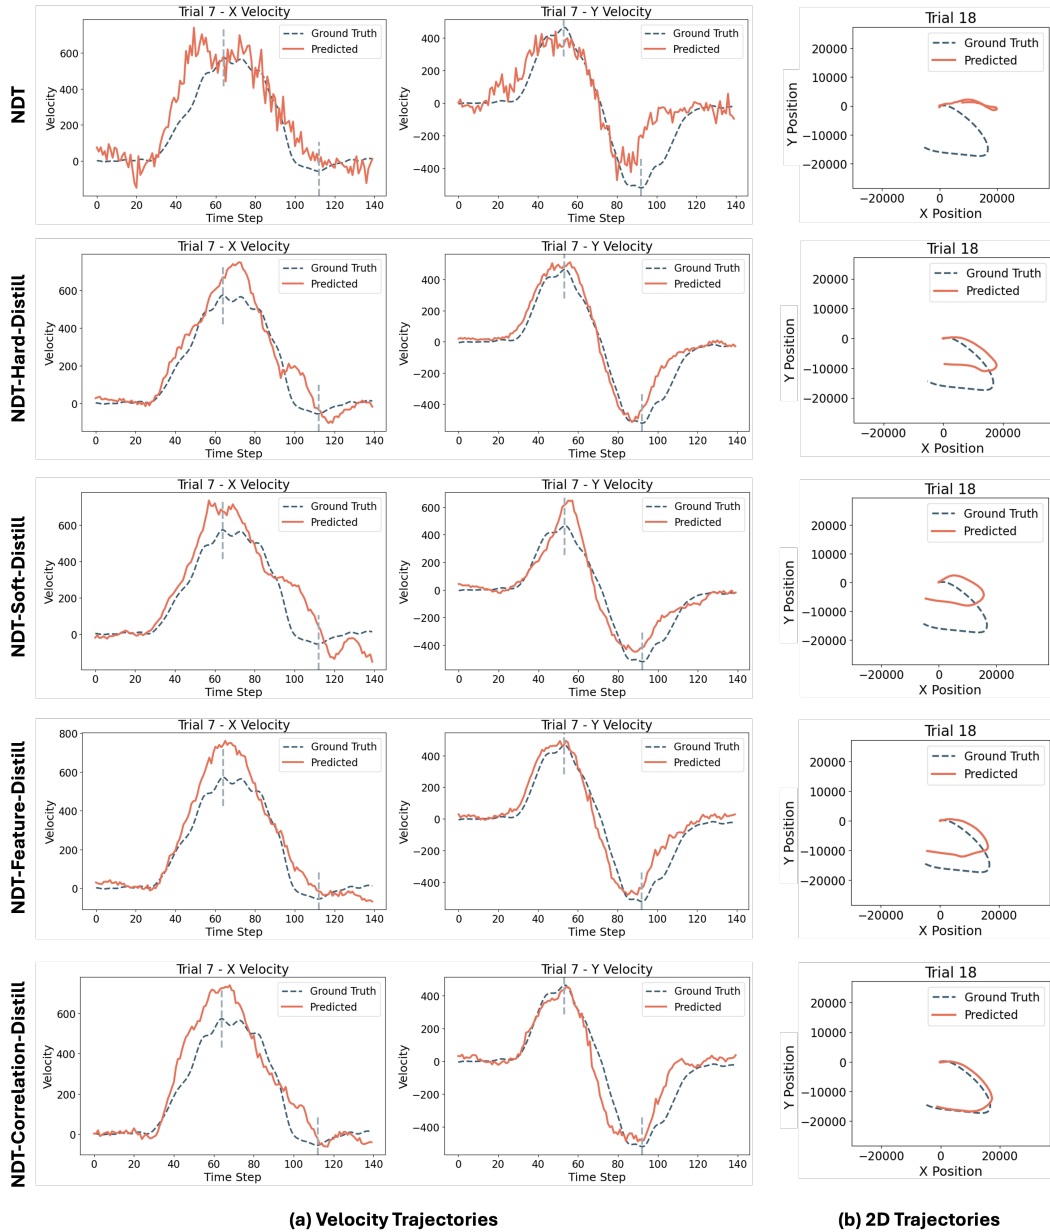

Figure 5: Visualization of predicted hand velocity on MC-Maze dataset of different behavior-guided distilled models, including based model NDT, NDT-Hard-Distill, NDT-Soft-Distill, NDT-Feature-Distill, and NDT-Correlation-Distill. (a) Prediction and ground truth of X and Y velocities, respectively. (b) Prediction and ground truth of 2D hand movement trajectory.

### 1026 A.6.1 1D HAND VELOCITY DECODING (X AND Y AXES)

1027  
1028 For X velocities, all distilled models show improved alignment with ground truth compared to the  
1029 base model NDT, especially during peak velocity periods (time steps 40-80). For the Y velocities,  
1030 our behavior-guided distilled models demonstrate better tracking of the ground truth, with reduced  
1031 oscillations and improved accuracy in predicting direction changes. Moreover, the distillation ap-  
1032 proaches are particularly effective in capturing the synchronous changes in X and Y velocities, sug-  
1033 gesting better prediction of overall motion dynamics. NDT-Correlation-Distill stands out with its  
1034 ability to accurately predict velocities in both dimensions simultaneously, indicating a strong grasp  
1035 of the interdependencies between X and Y motions.

### 1036 A.6.2 2D HAND MOVEMENT TRAJECTORY DECODING

1037  
1038 For 2-dimensional hand movement trajectory decoding, the base model NDT shows significant de-  
1039 viation from the ground truth, especially in the lower part of the trajectory. In contrast, all dis-  
1040 tillation methods demonstrate improved trajectory prediction, with closer alignment to the ground  
1041 truth path. Specifically, NDT-Correlation-Distill appears to provide the most accurate trajectory  
1042 prediction, closely matching the ground truth’s shape and endpoints.

### 1043 A.6.3 MODEL-SPECIFIC OBSERVATIONS

1044  
1045 For each distillation strategy employed in this study, the following key observations can be discerned  
1046 from Figure 5:

- 1047
- 1048 • NDT-Hard-Distill: Shows substantial improvement over base NDT in both velocity and  
1049 trajectory prediction.
- 1050 • NDT-Soft-Distill: Offers improved performance, though with some oscillations in velocity  
1051 predictions.
- 1052 • NDT-Feature-Distill: Demonstrates good overall performance, with smooth velocity curves  
1053 and accurate trajectory prediction.
- 1054 • NDT-Correlation-Distill: Appears to be the best-performing method, showing excellent  
1055 alignment with ground truth across all metrics.

1056  
1057 Overall, we could conclude that the behavior-guided distillation approaches clearly enhance the pre-  
1058 dictive capabilities of the NDT model. The improvements are particularly noticeable in handling  
1059 complex motions and maintaining accuracy over longer time horizons. The correlation-based dis-  
1060 tillation method seems to be the most effective, suggesting that preserving relational information  
1061 during distillation is crucial for accurate predictions.

### 1062 A.7 CROSS-CORRELATION ANALYSIS

1063  
1064 This subsection provides cross-correlation and mutual information analyses on the MC-Maze dataset  
1065 to quantify the relationship between neural activity and behavioral variables.

1066  
1067 The cross-correlation heatmap was generated by computing correlations between each neuron’s ac-  
1068 tivity and behavioral variables (X and Y velocities) across different time lags. For each neuron, the  
1069 data was flattened across trials and timepoints, detrended, and normalized before computing corre-  
1070 lations using a Fast Fourier Transform (FFT) method. The resulting correlations were arranged into  
1071 a matrix where each row represents a neuron, each column represents a time lag, and the color in-  
1072 tensity indicates the correlation strength. As shown in Fig. 6, our analysis revealed robust temporal  
1073 relationships between neural activity and movement kinematics. Nearly half of the recorded neurons  
1074 (47.4%) exhibited leading relationships with horizontal (X) velocity, while a slightly larger propor-  
1075 tion (54.7%) led vertical (Y) velocity components. Importantly, we observe median leads of 20ms  
1076 (X) and 10ms (Y), indicating that neural activity and behavior exhibit complex, complementary  
1077 dynamics.

1078  
1079 The strength of these neural-behavioral relationships was confirmed by highly significant correla-  
tions for both movement components ( $p < 0.001$  for both X and Y velocities). This robust statistical  
coupling explains why behavior serves as an effective privileged information source in our BLEND

1080 knowledge distillation framework, *i.e.*, it provides a reliable signal about the neural computations  
 1081 being performed. Crucially, we find that population-level mutual information (MI) is substantially  
 1082 higher than single-neuron MI, indicating that behavior captures coordinated neural dynamics that  
 1083 emerge at the population level. This difference demonstrates that behavior provides a window into  
 1084 population-level neural representations, which is a key motivation for our knowledge distillation  
 1085 approach.

1086 Taken together, these analyses show that neural activity and behavior in the MC-Maze dataset are  
 1087 strongly coupled, with behavior offering complementary, contextual information about the under-  
 1088 lying neural computations. By effectively leveraging these neural-behavioral relationships, our  
 1089 BLEND framework is able to achieve significant performance improvements in learning better neu-  
 1090 ral population representations. The robust temporal structure and statistical significance of the ob-  
 1091 served cross-correlations further validate the importance of behavior as a privileged signal in our  
 1092 knowledge distillation approach.

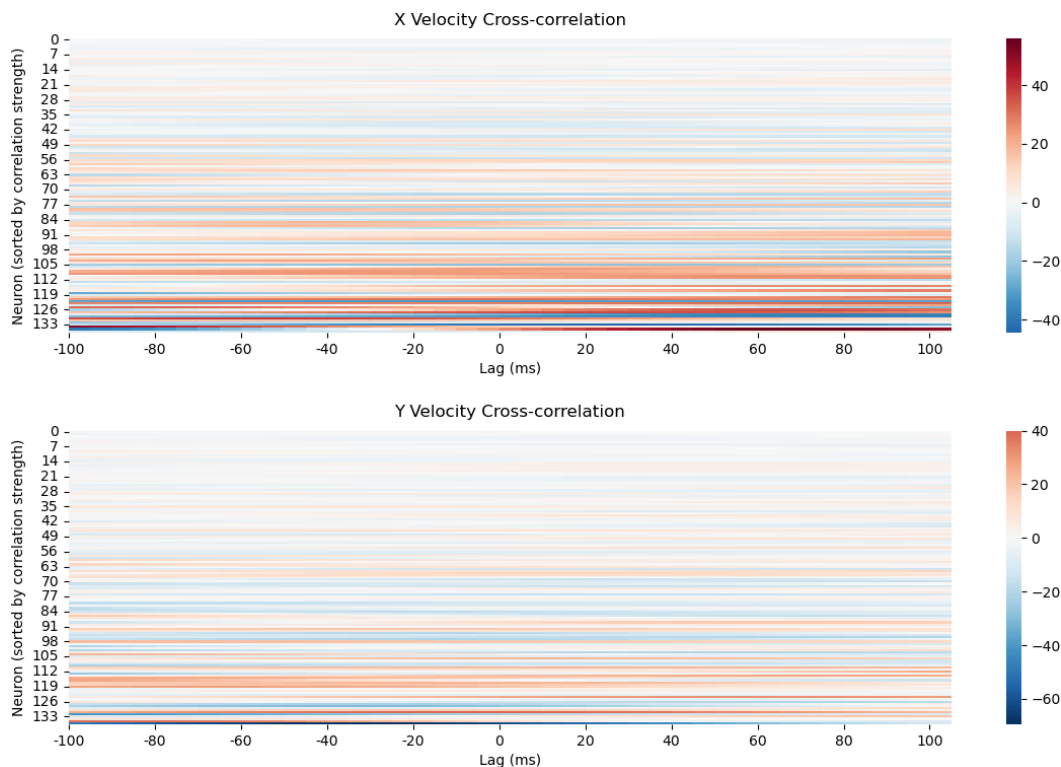

1104  
1105  
1106  
1107  
1108  
1109  
1110  
1111  
1112  
1113  
1114  
1115  
1116  
1117  
1118  
1119  
1120  
1121  
1122  
1123  
1124  
1125  
1126  
1127  
1128  
1129  
1130  
1131  
1132  
1133

Figure 6: Visualization of neural activity and behavior cross-correlation heatmap on MC-Maze dataset. Upper: cross-correlation between independent neurons and horizontal movement; Below: cross-correlation between independent neurons and vertical movement.

## A.8 EMPIRICAL STUDY ON BEHAVIOR GUIDANCE

To understand why incorporating behavior signals leads to better neural activity reconstruction, we conducted detailed analyses of the relationships between behavioral and neural data (exemplified with MC-Maze dataset).

### A.8.1 NEURAL SPACE ORGANIZATION

We first examined how behavior signals influence the organization of neural representations using t-SNE visualization (Figure 7). The baseline model’s representations (shown in red) appear as scattered, disconnected clusters across the neural space. In contrast, BLEND’s representations (shown in blue) form more cohesive structures, suggesting that behavior signals help constrain neural activ-

ity patterns into meaningful manifolds. This improved organization likely contributes to BLEND’s superior reconstruction capability.

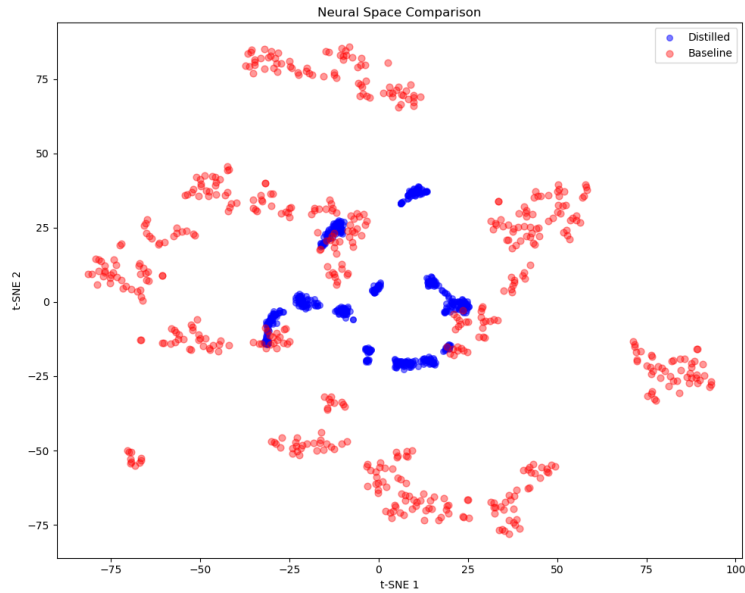

Figure 7: t-SNE visualization of neural representations showing the organization of neural space. Red points represent baseline model representations, while blue points show BLEND model representations. The more cohesive clustering of BLEND’s representations suggests better capture of underlying neural structure.

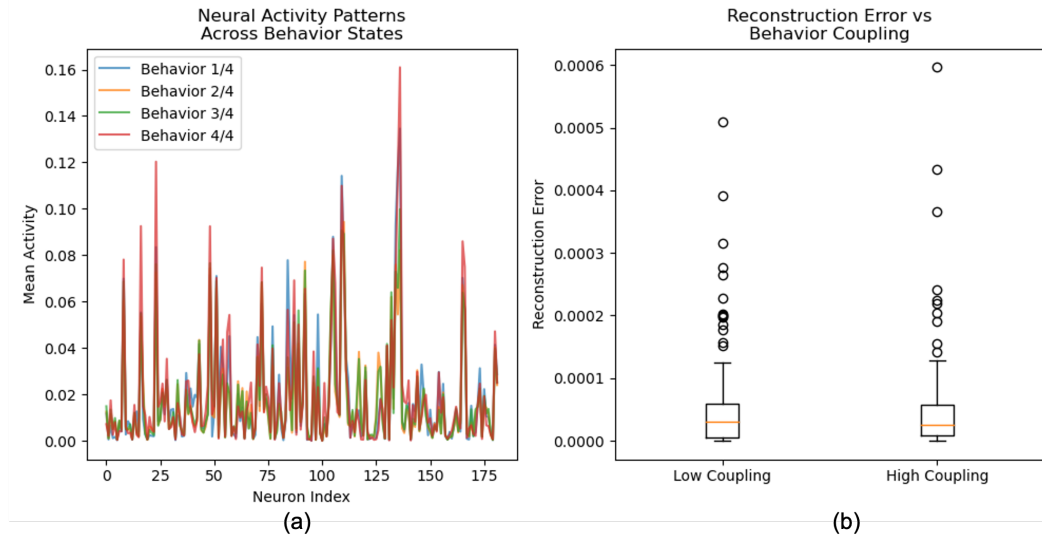

Figure 8: Behavior-neural analysis. (a) Neural activity patterns across different behavioral states show systematic variation. Different colors represent different behavior quartiles. (b) Box plots comparing reconstruction errors for neurons with low versus high behavior coupling, demonstrating improved reconstruction for behavior-coupled neurons.

#### A.8.2 BEHAVIOR-DEPENDENT NEURAL ACTIVITY PATTERNS

We analyzed how neural activity patterns vary systematically with behavioral states (Figure 8, left). The behavioral states were determined through the behavior data, which consists of two continu-

ous variables (x and y coordinates of hand position) over time. We used the first behavior variable (x coordinate) and divided it into quartiles using numpy’s percentile function: `behavior_bins = percentile(behavior_data, [0, 25, 50, 75, 100])`. This created four behavior states (1/4 through 4/4), representing different ranges of hand positions. For each state, we computed the mean neural activity pattern across all time points falling within that state. The resulting patterns show clear modulation of neural activity by behavioral state, with distinct activity profiles for different hand positions. Some neurons (e.g., indices 25, 50, and 125) show particularly strong behavior-dependent modulation.

### A.8.3 RECONSTRUCTION QUALITY ANALYSIS

We quantitatively assessed how behavior coupling influences reconstruction quality through a comprehensive analysis framework. First, we quantified behavior-neural coupling using mutual information (MI):  $MI(N_i, B) = \sum_{n,b} p(n,b) \log \frac{p(n,b)}{p(n)p(b)}$ , where  $N_i$  is the activity of neuron  $i$  and  $B$  is the behavior variable. We computed this for each neuron using scikit-learn’s `mutual_info_regression` function. Neurons were then classified into high coupling ( $MI > \text{median}$ ) and low coupling ( $MI \leq \text{median}$ ) groups.

For each neuron  $i$ , we computed the reconstruction error as  $E_i = \frac{1}{T} \sum_{t=1}^T (\hat{r}_i^t - r_i^t)^2$ , where  $\hat{r}_i^t$  is the predicted firing rate and  $r_i^t$  is the true firing rate at time  $t$ . The box plots (Figure 8, right) show the distribution of these errors for both groups. Statistical analysis revealed significant differences between high and low coupling groups (Wilcoxon rank-sum test:  $p < 0.001$ ), with high-coupling neurons showing consistently lower reconstruction errors.

These analyses collectively demonstrate that BLEND’s improved performance stems from its ability to leverage inherent structure in behavior-neural relationships. The systematic variation of neural activity with behavior and the improved reconstruction for behavior-coupled neurons provide strong empirical evidence for the effectiveness of incorporating behavior signals in neural activity reconstruction.

### A.9 DISTILLATION STRATEGY EVALUATION ON SYNTHETIC DATA

This subsection provides a detailed exploration and a comprehensive understanding of when and why different strategies excel. We conduct additional experiments using carefully designed synthetic datasets that mirror the structure of real neural recordings while allowing precise control over neural-behavioral relationships.

We created three types of synthetic datasets with distinct characteristics.

- **Simple:** The first type implements simple linear relationships between neural activity and behavior, designed to test basic knowledge transfer. In this dataset, neural activity is directly derived from sinusoidal behavioral trajectories through a linear transformation. This creates a clear and interpretable relationship between behavior and neural responses, with added Poisson noise to simulate realistic spike counts.
- **Hierarchical:** The second type features hierarchical relationships where different neuron groups encode behaviors at varying timescales, simulating the layered processing often observed in neural circuits. The hierarchical dataset introduces temporal complexity by dividing neurons into three functional groups, each processing behavior at different timescales. Fast neurons respond to immediate behavior, medium neurons integrate over 5 timepoints, and slow neurons average over 10 timepoints, creating a rich temporal hierarchy that mirrors the multi-timescale processing observed in real neural systems.
- **Complex:** The third type incorporates complex population-level correlations with temporal dependencies, mimicking the intricate dynamics found in real neural populations. The complex population dataset represents the most sophisticated model, organizing neurons into five correlated assemblies with explicit population-level structure. This dataset features decaying sinusoidal behavior patterns and maintains specific correlation structures (0.3 within groups) through multivariate normal noise, creating realistic population dynamics.

| Methods                 | Simple | Hierarchical | Complex |
|-------------------------|--------|--------------|---------|
| LFADS-Hard-Distill      | 0.985  | 0.976        | 0.182   |
| NDT-Hard-Distill        | 0.934  | 0.926        | 0.147   |
| NDT-Soft-Distill        | 0.927  | 0.932        | 0.146   |
| NDT-Feature-Distill     | 0.926  | 0.940        | 0.139   |
| NDT-Correlation-Distill | 0.935  | 0.944        | 0.180   |

Table 4: Results showing variants of BLEND framework on three synthetic datasets with distinct characteristics. Vel- $R^2$  is used as the measurement metric.

All three datasets share common dimensions (2,869 trials, 140 timepoints, 182 neurons, 2 behavioral variables) and are systematically divided into train/eval splits and held-in/held-out neurons, enabling rigorous testing of neural analysis methods.

Our experiments with these synthetic datasets revealed clear patterns that explain the performance differences observed in Table 4. LFADS consistently performed better with Hard Distillation across all synthetic cases, particularly excelling with simple linear relationships (around 6% improvement over NDT-based variants in Vel- $R^2$ ). This aligns with our understanding that LFADS’s RNN-based architecture, with its inherent temporal continuity and built-in constraints, benefits most from direct knowledge transfer. The architecture’s strong internal regularization makes it well-suited for precise, deterministic knowledge transfer through hard distillation.

Conversely, NDT showed superior performance with Correlation Distillation, especially in cases with complex population-level correlations (around 20% improvement over other NDT-based variants). This finding stems from NDT’s transformer-based architecture, which processes information in parallel and lacks inherent temporal constraints. The correlation distillation strategy provides valuable structural guidance that complements NDT’s flexible architecture, helping it maintain important population-level relationships in the learned representations.

**Intuitions and guidelines:** These insights from synthetic data experiments provide concrete guidelines for strategy selection in practice. For architectures with strong internal regularization like LFADS, Hard Distillation offers the most direct and effective knowledge transfer. For more flexible architectures like NDT, Correlation Distillation helps maintain complex population dynamics and temporal relationships. Soft Distillation, serving as a robust middle-ground option, can be beneficial for datasets where subtle variations in neural responses need to be preserved, though it may not fully capture complex population-level dynamics. Feature Distillation, while generally showing more modest improvements, is particularly effective when the neural data exhibits a clear hierarchical structure, as it can capture relationships across different levels of neural representation. This understanding not only explains the performance patterns in our original results but also offers a principled approach to selecting distillation strategies for future applications of BLEND to different neural datasets and architectures.

#### A.10 EXTENDING BLEND TO DISCRETE OR NON-TEMPORAL BEHAVIOR LABELS

To verify the capability of BLEND with discrete or non-temporal behavior observations, we extend BLEND on the DMFC-RGS dataset from NLB’21 Benchmark Pei et al. (2021), which contains recordings from dorso-medial frontal cortex (DMFC) during a cognitive timing task known as Ready-Set-Go (RSG). The behavioral variables in this task are distinctly discrete in nature. The task incorporates five key behavioral features, represented as binary or categorical variables: ‘is\_eye’ indicating whether the response was an eye movement (1) or joystick movement (0), ‘theta’ specifying the categorical direction of movement (left or right), and ‘is\_short’ denoting whether the trial used the Short prior (1) or Long prior (0). The remaining variables ‘ts’ and ‘tp’ represent the sample and produced time intervals respectively. These discrete behavioral choices create a structured experimental design with clearly defined conditions.

Given that this dataset has discrete and non-temporal behavior labels, we align the neural activity and behavior by introducing a learnable temporal position encoding for discrete behavior variables across the length of neural recording. We compare NDT-Hard-Distill with the original NDT model on this dataset, and this simple extension shows improvement in both Co-Bps (0.127 achieved by



1296 NDT-Hard-Distill and 0.118 achieved by NDT) and PSTH- $R^2$  (0.444 achieved by NDT-Hard-Distill  
1297 and 0.338 achieved by NDT).

1298 These promising results demonstrate the effectiveness of BLEND on both continuous/discrete and  
1299 temporal/non-temporal behavior observations, showcasing a flexible solution we provide for learn-  
1300 ing better neural population dynamics.  
1301

1302

1303

1304

1305

1306

1307

1308

1309

1310

1311

1312

1313

1314

1315

1316

1317

1318

1319

1320

1321

1322

1323

1324

1325

1326

1327

1328

1329

1330

1331

1332

1333

1334

1335

1336

1337

1338

1339

1340

1341

1342

1343

1344

1345

1346

1347

1348

1349
